# Supplementary material for: Academic versus non-academic neurosurgeons in China: a national cross-sectional study on workload, burnout and engagement
Source: PubMed Central journal article supplement — BMJ Open. 2019 Oct 16;9(10):e028309. doi: 10.1136/bmjopen-2018-028309 (PMC6797254; doi:10.1136/bmjopen-2018-028309), 2019-10-16
Supplement: bmjopen-2018-028309.draft_revisions.pdf [file bmjopen-2018-028309.draft_revisions.pdf]

# BMJ Open

BMJ Open is committed to open peer review. As part of this commitment we make the peer review history of every article we publish publicly available.

When an article is published we post the peer reviewers' comments and the authors' responses online. We also post the versions of the paper that were used during peer review. These are the versions that the peer review comments apply to.

The versions of the paper that follow are the versions that were submitted during the peer review process. They are not the versions of record or the final published versions. They should not be cited or distributed as the published version of this manuscript.

BMJ Open is an open access journal and the full, final, typeset and author-corrected version of record of the manuscript is available on our site with no access controls, subscription charges or pay-per-view fees (<http://bmjopen.bmj.com>).

If you have any questions on BMJ Open's open peer review process please email [info.bmjopen@bmj.com](mailto:info.bmjopen@bmj.com)

# BMJ Open

## Academic vs. non-academic neurosurgeons in China: a comparison in terms of workload, burnout, and engagement

|                               |                                                                                                                                                                                                                                                                                                                                                                                              |
|-------------------------------|----------------------------------------------------------------------------------------------------------------------------------------------------------------------------------------------------------------------------------------------------------------------------------------------------------------------------------------------------------------------------------------------|
| Journal:                      | <i>BMJ Open</i>                                                                                                                                                                                                                                                                                                                                                                              |
| Manuscript ID                 | bmjopen-2018-028309                                                                                                                                                                                                                                                                                                                                                                          |
| Article Type:                 | Research                                                                                                                                                                                                                                                                                                                                                                                     |
| Date Submitted by the Author: | 01-Dec-2018                                                                                                                                                                                                                                                                                                                                                                                  |
| Complete List of Authors:     | Yu, Jinli; Huashan Hospital, Fudan University, Department of International Education and cooperation<br>Gao, Jiming; Huashan Hospital Fudan University, Department of Medical Education<br>Chen, Junyan; East China Institute of Telecommunications, The Artificial Intelligence and Big Data Business Division<br>Sun, Yirui; Huashan Hospital Fudan University, Department of Neurosurgery |
| Keywords:                     | Neurosurgeon, China, academic, burnout, job satisfaction, engagement                                                                                                                                                                                                                                                                                                                         |
|                               |                                                                                                                                                                                                                                                                                                                                                                                              |

SCHOLARONE™  
Manuscripts

# Academic vs. non-academic neurosurgeons in China: a comparison in terms of workload, burnout, and engagement

Jinli Yu MA.<sup>1,2</sup>, Jiming Gao MD.<sup>3</sup>, Junyan Chen Ph.D<sup>4</sup>, Yirui Sun MD. Ph.D<sup>5</sup>

1. Department of International Education and cooperation, Huashan Hospital, Fudan University
2. Department of Human Resource Management, Huashan Hospital, Fudan University
3. Department of Medical Education, Huashan Hospital, Fudan University.
4. The Artificial Intelligence and Big Data Business Division, East China Institute of Telecommunications
5. Department of Neurosurgery, Huashan Hospital, Fudan University.

## Corresponding author:

Yirui Sun MD. Ph.D

Email: yirui.sun@live.cn

Department of Neurosurgery, Huashan Hospital, Fudan University

12 Urumqi Middle Road, Shanghai, China, 200040

## Keywords:

Neurosurgeon; China; academic; burnout; job satisfaction; engagement.

**Running Title:** Academic vs. Non-academic neurosurgeons in China

## Abstract

**Objectives:** Chinese neurosurgery has made great progress during the past decades, yet little is known about their working status. This study aimed to evaluate the difference between academic and non-academic neurosurgeons, focusing on their professional burnout, job satisfaction, and work engagement.

**Design:** Cross-sectional national wide survey.

**Study setting:** The survey was conducted in China between 2017 and 2018.

**Participants:** A total number of 823 academic neurosurgeons and 379 non-academic neurosurgeons participated in this study.

**Outcome measures:** Professional burnout, job satisfaction, and work engagement were assessed using the Maslach Burnout Inventory, the Job Descriptive Index and the Utrecht Work Engagement Scale, respectively.

**Results:** The majority of respondents were male (92.93%), less than 45 years old (85.27%), and married (79.53%). Chinese neurosurgeons worked  $63.91 \pm 11.04$  hours per week. Approximately 45% of respondents were burnout. Compared with non-academic respondents, academic neurosurgeons had longer working hours ( $p < 0.01$ ), higher income ( $p < 0.01$ ), less willing to get married ( $p < 0.01$ ). In addition, they showed a lower degree of burnout ( $p < 0.01$ ), a higher level of job satisfaction ( $p < 0.01$ ), and were more enthusiastic at work ( $p = 0.015$ ). Multivariate regression analyses indicated that being divorced (OR 7.02, 95% CI 2.37-15.08) and hospital violence (OR 1.52, 95% CI 1.18-2.24) were associated with burnout for both academic and non-academic respondents. Long working hours ( $\geq 71$  hours per week) and low annual income ( $< 100,000$  RMB) were risk factors for burnout among academic neurosurgeons. For non-academic neurosurgical surgeons, age between 36-45, working as attending doctors, serving in public hospitals, and having the first house living kid were closely related to the incidence of burnout.

**Conclusions:** Chinese neurosurgeons are under significant stress particularly for the non-academic neurosurgeons. Offering better opportunities for training, promotion, higher income, and safer working environments could be solutions to release burnout and improve career satisfaction and engagement.

**Registration:** Chinese Clinical Trial Registry (ChiCTR1800014762).

### Strengths and limitations of this study:

This is the first national survey on academic and non-academic neurosurgeons in China.

Standard and developed scales such MBI, JDI, and UEWS were applied, allowing comparisons with results from other authors.

Selection bias may exist during the survey.

### Introduction

Chinese neurosurgery has a relatively short history. The first formal record of neurosurgical procedure could be traced back to 1950, when the first craniotomy operation was performed in Shanghai by Dr. Kefei Shan and Yuquan Shi<sup>17</sup>. Back at that time, Chinese neurosurgical facilities started with only a few pioneer surgeons and limited beds<sup>2,17</sup>. A remarkable milestone in the development of Chinese neurosurgery is the foundation of Chinese Neurosurgical Society (CNS) in 1986, since when started the rapid development<sup>1,22</sup>. To date, China has over 11,000 registered neurosurgeons, consisting the largest neurosurgeon group of the world (data from the World Federation of Neurosurgical Societies official website, [www.wfns.org](http://www.wfns.org)). Modern neurosurgical clinic centers have been established in many major cities, with some performing over 8,000 sophisticated operations annually<sup>17,22</sup>. In addition to the increase in the number of surgeons and operations, Chinese neurosurgery has also made remarkable progress in academic research. Studies have indicated that China contributed approximately 4.2% of published neurosurgical research in the world. The amount was ranked fifth in the world, behind U.S, Japan, Germany, and U.K. More importantly, China has emerged as the only country among the top 5 with substantial growth of neurosurgical research productivity (121.9% ± 9.98% per year)<sup>5</sup>.

Despite the remarkable achievement, to our knowledge, no study has been done to reveal the working status of Chinese neurosurgeons. The Chinese healthcare system recruits physicians to work in hospitals in three levels. General practitioners usually work in level I hospitals, also known as community health centers. Level I hospitals usually provide primary health care and are not equipped with neurosurgical facilities. The Level II

1  
2  
3 hospitals, also known as regional medical centers, recruit specialists of various fields.  
4 These hospitals largely focus on conducting treatment of common diseases including  
5 routine neurosurgical operations. The tertiary (level III) hospitals are usually university  
6 hospitals and national medical centers. Neurosurgeons working in tertiary hospitals are  
7 requested to take care of complex cases (usually transferred from regional hospitals), but  
8 also to conduct clinical/basic research, teaching, tutoring, and sometimes international  
9 cooperating projects. Therefore, the neurosurgical surgeons working in tertiary hospitals  
10 are usually considered academic neurosurgeons and those working in regional hospitals  
11 as the non-academic.  
12  
13  
14  
15  
16  
17  
18

19  
20 An inherent and nature belief holds that the academic neurosurgeons may under  
21 significant stress due to additional responsibilities. However, during our previous study to  
22 assess the working status of Chinese physicians from various specialties, subgroup  
23 analyses suggested that surgeons working in regional hospitals were actually more  
24 stressful (submitted and under review). Yet, in-depth investigations could not be  
25 performed due to limited case numbers. Here, we reported the results on a national survey  
26 on Chinese neurosurgeons. The focus of this study is to reveal the working status as well  
27 as the difference between academic and non-academic of neurosurgeons. Detailed  
28 methods and results are described below.  
29  
30  
31  
32  
33  
34  
35  
36

## 37 **Materials and Methods**

### 38 *Study design & questionnaires*

39  
40 From Jun. 2017 to Sep. 2018, a national online survey was conducted in mainland China  
41 using both smartphone apps and website visiting with the support of the East Institution  
42 of China Academy of Information and Communications Technology. This study was a  
43 part of a two-phase national survey on the working and living status of Chinese  
44 physicians, which was approved and registered with the Chinese Clinical Trial Registry  
45 (ChiCTR1800014762). The Phase I investigation recruited 1167 physicians of various  
46 specialties including neurosurgery between Jun. 2017 to Feb. 2018. This part of the study  
47 focused on the comparison between specialties (submitted elsewhere and under review).  
48 The phase II investigation was conducted between Mar. to Sep. 2018, in which the  
49  
50  
51  
52  
53  
54  
55  
56  
57  
58  
59  
60

1  
2  
3 working and living status of each specialty is further investigated. Answers from  
4 practicing neurosurgeons in both phase I and II investigations were analyzed in this study.  
5 Potential respondents were invited to complete the online questionnaires via mailing lists  
6 of the Shanghai Medical Doctor Association, the national continuing education platform  
7 “Neurosurgery News”, and the professional networks of the authors. Neurosurgeons were  
8 also invited during national or local conferences via QR scanning. All answers were  
9 collected anonymously. To avoid repeated participation, each IP address is restricted to  
10 fill out the questionnaire once.  
11  
12  
13  
14  
15  
16  
17

18  
19 The questionnaire consisted of 147 closed-end questions, organized in sections including  
20 demographic and practice characteristics, professional burnout, job satisfaction, and work  
21 engagement. Most questions were derived from the well-established and standard scales  
22 (see below). A few questions were derived from previous studies <sup>16,19,20</sup> or were  
23 developed by the authors. Details for each section are described as follows.  
24  
25  
26  
27  
28

### 29 *Demographic and practice characteristics*

30  
31 Respondents were asked to provide gender, marital and family status, job titles,  
32 nature of employer, weekly working hours, annual income, experience of hospital  
33 violence, and whether a respondent would encourage his/her kid(s) to become a doctor.  
34 Neurosurgical respondents working in tertiary hospitals were considered academic  
35 neurosurgeons, and those from regional hospitals were considered as non-academic  
36 neurosurgeons.  
37  
38  
39  
40  
41  
42

### 43 *Burnout*

44  
45 Professional burnout was measured by the Maslach Burnout Inventory (MBI). The MBI  
46 has 22 items covering three dimensions: Emotional Exhaustion (EE, 9 items),  
47 Depersonalization (DP, 5 items), and Personal Accomplishments (PA, 8 items). Answers  
48 to each question were designed according to the frequency of a respondent’s  
49 encountering situations on a 7-point scale, from “never” (0 points) to “daily” (6 points).  
50 MBI scores of each dimension were further graded as high, intermediate, or low (low  
51  $EE \leq 18$ ; high  $EE \geq 27$ ; low  $DP \leq 5$ , high  $DP \geq 10$ ; low  $PA \leq 33$ ; high  $PA \geq 40$ )<sup>8</sup>. A respondent  
52  
53  
54  
55  
56  
57  
58  
59  
60

1  
2  
3 would be considered burnout if he/she had high scores in the Emotional Exhaustion or  
4 Depersonalization assessment<sup>8,10,13</sup>. The internal consistency of the questionnaire was  
5 presented as Cronbach's  $\alpha$  values for each section (0.91, 0.90, and 0.85, respectively).  
6  
7  
8  
9

### 10 *Job satisfaction*

11 The respondents' job satisfaction was assessed by the Index of Job Satisfaction (JDI).  
12 The JDI questionnaire contained questions on five independent dimensions, namely,  
13 Work Itself (22 items), Pay (9 items), Promotion (7 items), Co-workers (11 items), and  
14 Supervision (14 items)<sup>6,14</sup>. Each item was scored Yes=3, ?=1, and No=0, with negatively  
15 worded items being reverse-coded. A JDI score for each respondent was calculated as  
16 the sum of all his/her answers, with the scores of the Promotion and Pay sections being  
17 multiplied by 2. The Cronbach's  $\alpha$  values of the 5 JDI subscales were 0.89, 0.94, 0.88,  
18 0.90, and 0.87, respectively.  
19  
20  
21  
22  
23  
24  
25  
26

### 27 *Work engagement*

28 Work engagement was measured using the 17-item Utrecht Work Engagement Scale  
29 (UWES). The UWES had three subscales: Vigor (6 items), Dedication (5 items) and  
30 Absorption (6 items). All items were rated on a 7-point Likert scale (0-6). The sum of all  
31 items was used as a UWES score<sup>4,11,12</sup>. The internal consistency for the UWES  
32 questionnaire was presented as a Cronbach's  $\alpha$  value of 0.85.  
33  
34  
35  
36  
37  
38

### 39 *Data analysis*

40 Data analysis was performed using SPSS 18 (SPSS Inc., Chicago, U.S.). Quantitative  
41 data were presented as means  $\pm$  standard deviations (SD). Shapiro-Wilk W test and F test  
42 were performed for normality and homogeneity. Independent samples t-test, Wilcoxon  
43 rank-sum test, and one-way analysis of variance (ANOVA) were used for the quantitative  
44 data of independent groups. Chi-square and Fisher exact tests were used for nominal  
45 variables. Statistical significance was considered with a two-tailed p-value less than 0.05.  
46  
47  
48  
49  
50  
51  
52

## 53 **Results**

### 54 *Demographic & practice characteristics of respondents*

55  
56  
57  
58  
59  
60



1  
2  
3 A total number of 1,202 practicing neurosurgeons completed the survey. Considering the  
4 fact that approximately two-thirds of 11,000 registered neurosurgeons in China have  
5 received proper training and being active<sup>21</sup>, the pool of responding neurosurgeons in this  
6 study may represent approximately 16% of Chinese neurosurgeons.  
7  
8  
9

10  
11  
12 The demographic and practice characteristics of responding neurosurgeons were  
13 summarized in Table 1. Their mean age was  $34.32 \pm 7.21$  years, with a male to female  
14 ratio of 13.14:1. Among the respondents, 956 (79.53%) were married and 50 (4.16%)  
15 were divorced. Approximately three-quarters of neurosurgeons had home-living kids, and  
16 23.87% (30.02% of the married) had more than one child. The majority (91.93%) of  
17 responding neurosurgeons worked in public hospitals. They work an average of  
18  $63.91 \pm 11.04$  hours a week, with an annual income of  $11.13 \pm 4.85 \times 10^4$  RMB  
19 (approximately  $16,000 \pm 6,990$  USD). Interns, residents, attending doctors, and  
20 senior/chief neurosurgeons constituted 3.00%, 27.95%, 42.35%, and 26.71% of all  
21 respondents, respectively. There were 37.94% of surveyed neurosurgeons claimed that  
22 they had experienced or witnessed hospital violence in the last 5 years. Only 6.6% of  
23 respondents would encourage their offspring to become a doctor.  
24  
25  
26  
27  
28  
29  
30  
31  
32  
33

34 Among all 1202 respondents, there were 823 (68.47%) academic and 379 (31.53%) non-  
35 academic neurosurgeons. The two groups had no statistical difference in terms of gender,  
36 age, marital status, and job titles. However, a larger proportion of academic  
37 neurosurgeons were single compared to the non-academic (19.93% vs. 8.44%  $p < 0.01$ ),  
38 and the former preferred to have fewer children after marriage (Table 1). While the  
39 majority (91.93%) of academic neurosurgeons working in public hospitals, nearly 18% of  
40 non-academic neurosurgeons chose to work in private medical facilities ( $p < 0.01$ , Table 1).  
41 Both academic and non-academic neurosurgeons spent approximately 60 hours per week  
42 on clinical work ( $56.17 \pm 9.12$  vs.  $61.42 \pm 7.92$  hours,  $p < 0.01$ ). The academic  
43 neurosurgeons required additional  $8.21 \pm 4.64$  hours per week on teaching and research  
44 such as university lectures, lab work, clinical trials, paper writing, etc., which made their  
45 average working hours longer than the non-academic ( $p < 0.01$ , Table 1). Accordingly, the  
46 average annual income of the academic neurosurgeons was statistically higher than their  
47  
48  
49  
50  
51  
52  
53  
54  
55  
56  
57  
58  
59  
60

1  
2  
3 non-academic colleagues ( $11.37 \pm 4.29 \times 10^4$  RMB,  $16,300 \pm 6,100$  USD vs.  $10.02 \pm 5.21 \times 10^4$   
4 RMB,  $14,300 \pm 7,500$  USD,  $p < 0.01$ ). The gap in income was also reflected by the  
5 difference in proportions of high-income individuals (Table 1). Some other notable  
6 difference included that the non-academic neurosurgeons had a higher risk of  
7 experiencing or witnessing hospital violence (44.06% vs. 35.12%,  $p < 0.01$ ), and they were  
8 less likely to encourage their child(ren) to become a doctor ( $p < 0.01$ ) (Table 1).  
9  
10  
11  
12  
13

### 14 15 *Career Burnout*

16 Career Burnout was assessed by the MBI questionnaire and summarized in Table 2.  
17 Overall, 44.51% of responding neurosurgeons were burnout. There were 36.11% of  
18 respondents showing high levels of Emotional Exhaustion, 29.62% with high  
19 Depersonalization, and 12.26% with a low sense of Personal Accomplishment (Table 2).  
20 Although academic neurosurgeons had longer weekly working hours and more workload,  
21 the incidence of burnout was significantly lower among the academic neurosurgeons than  
22 among the non-academic (37.91% vs. 58.84%,  $p < 0.01$ ). In addition, the academic  
23 neurosurgeons scored better in all three assessed dimensions ( $p < 0.01$ ,  $p < 0.01$ , and  $p < 0.01$ ,  
24 respectively, Table 2).  
25  
26  
27  
28  
29  
30  
31  
32  
33

### 34 35 *Job satisfaction*

36 Job satisfaction was measured by JDI and the five subscales (Table 3). The mean JDI  
37 score for all surveyed neurosurgeons was  $102.60 \pm 36.63$ . The academic neurosurgeons  
38 showed significantly higher scores (being more satisfied) when they were asked to  
39 comment on Work Itself, Promotion, and Supervision ( $p < 0.01$ ,  $p < 0.01$ , and  $p < 0.01$ ,  
40 respectively, Table 3). There was no statistical difference in the comments on Pay and  
41 Coworker ( $p = 0.059$  and  $0.45$ , respectively, Table 3).  
42  
43  
44  
45  
46  
47

### 48 49 *Work engagement*

50 The UWES scores indicated the difference of work engagement between the academic  
51 and non-academic neurosurgeons (Table 4). Overall, the academic neurosurgeons scored  
52 higher (being more enthusiasm for work) than their non-academic colleagues ( $p = 0.015$ ).  
53 For JDI subscales, academic neurosurgeons were more dedicated to work ( $p < 0.01$ ). Yet,  
54  
55  
56  
57  
58  
59  
60

1  
2  
3 the academic and non-academic neurosurgeons showed no difference in the Vigor and  
4 Absorption assessment ( $p=0.057$ ,  $\eta^2=0.059$ , respectively, Table 4).  
5  
6  
7

### 8 *Multivariate analysis*

9  
10 Multivariate regression analyses indicated that, in general, being divorced, having one (or  
11 the first) home-living kid, working as attending doctors, prolonged working hours ( $\geq 71$   
12 hours per week), low annual income ( $< 100,000$  RMB,  $\sim 14,400$  USD), and hospital  
13 violence were significantly related to professional burnout (Table 5). However, the  
14 impacts of the above factors were not constant between the academic and non-academic  
15 neurosurgeons. Working in public hospitals was an independent risk factor for burnout  
16 among non-academic neurosurgeons (OR 5.37, 95% CI 2.969-9.67,  $p < 0.0001$ ). In  
17 addition, surgeons' age, number of house living kids, and job titles were associated with  
18 burnout among non-academic neurosurgeons but not the academic respondents (Table 5).  
19 Subgroup analysis also indicated that academic neurosurgeons may have a relatively  
20 lower expectation of income. While the annual income between 110,000-150,000 RMB  
21 (14,400-21,600 USD) was negatively related to professional burnout among academic  
22 neurosurgeons (OR 0.63, 95% CI 0.46-0.86,  $p < 0.01$ ), a similar association was only  
23 observed when the annual income exceeded 160,000 RMB (23,000 USD) among non-  
24 academic respondents (OR 0.29, 95% CI 0.15-0.58,  $p < 0.01$ , Table 5).  
25  
26  
27  
28  
29  
30  
31  
32  
33  
34  
35  
36  
37

### 38 **Discussion**

39  
40 There is no doubt that Chinese neurosurgery has made a remarkable improvement in the  
41 past decades<sup>1,5,22</sup>. On the stage of today's neurosurgery, the voice of Chinese can often  
42 be heard. Chinese neurosurgeons now present progress only in the case numbers and  
43 operating techniques, but also in the amount and quality of academic research. Yet,  
44 despite applaud for the great achievement, little attention has been paid to the working  
45 status of Chinese neurosurgical surgeons. In this study, our survey indicates that, in  
46 general, Chinese neurosurgeons were facing great pressure, from both the work itself and  
47 outside environment. In addition, although academic neurosurgeons had heavier  
48 workloads and longer working hours than non-academic neurosurgeons, they were more  
49 satisfied with their job and more committed to the work, and less likely to be professional  
50  
51  
52  
53  
54  
55  
56  
57  
58  
59  
60

1  
2  
3 burnout. The reasons for the phenomena may be complex, yet we speculate several  
4 possible explanations, discussed as follows.  
5  
6  
7

8  
9 First of all, the income gap may play an important role. Probably one of the most  
10 apparent differences between Chinese academic and non-academic neurosurgeons is that  
11 the former in average has higher annual income (Table 1). It has been demonstrated many  
12 times that pay is one of the most important contributors to job satisfaction, work  
13 engagement, and consequently professional burnout in multiple industries <sup>7,9,10,15</sup>.  
14 Currently, Chinese tertiary hospitals are attracting an increasing number of patients due  
15 to reputations and skillful physicians. Under the principle of performance appraisal which  
16 has been emphasized and adapted by health care facilities across the nations, academic  
17 neurosurgeons were better paid. However, it does not imply that neurosurgeons are  
18 individuals with high-income. On the contrary, although neurosurgeons are paid  
19 approximately 100,000 to 110,000 RMB (14,400-15,800 USD) a year, which is 1.11-1.22  
20 times more than the average wages of Chinese urban employees (89,993 RMB, 13,000  
21 USD, data from the National Bureau of Statistics of China,  
22 <http://data.stats.gov.cn/easyquery.htm?cn=C01>), they are actually underpaid considering  
23 the long working hours (nearly 70 hours per week), prolonged training, vast workload,  
24 and high responsibilities.  
25  
26  
27  
28  
29  
30  
31  
32  
33  
34  
35  
36  
37

38 Second, academic neurosurgeons may have better career development. As employees of  
39 university hospitals and national medical centers, academic neurosurgeons have more  
40 opportunities to get funding support and build collaborations, which is crucial for  
41 research breakthroughs and development of personal career. According to the records of  
42 WFNS ([www.wfns.org](http://www.wfns.org)), AANS (American Association of Neurological Surgeons,  
43 [www.aans.org](http://www.aans.org)), and EANS (European Association of Neurosurgical Societies,  
44 [www.eans.org](http://www.eans.org)), the three major organizations each holding an international neurosurgical  
45 conference annually, almost all Chinese speakers or poster authors came from tertiary  
46 hospitals. In addition, the database from ClinicalTrials ([www.clinicaltrials.gov](http://www.clinicaltrials.gov)) and  
47 Chinese Clinical Trial Registry (ChiCTR, [www.chictr.org.cn](http://www.chictr.org.cn)) indicates that the majority  
48 of multi-center projects are led or exclusively recruit partners from tertiary hospitals. The  
49  
50  
51  
52  
53  
54  
55  
56  
57  
58  
59  
60

1  
2  
3 advantages in career development, especially getting support from a national level and  
4 collaborations with world-leading research facilities, may provide academic  
5 neurosurgeons sense of superiority, and consequently have positive impacts on job  
6 satisfaction and engagement <sup>3</sup>.  
7  
8  
9

10  
11  
12 Thirdly, tertiary hospitals may provide a safer working environment. The deterioration  
13 doctor-patient relationship has become a major issue in the Chinese medical system.  
14 During the last two decades, Chinese doctors have been threatened by a surge of hospital  
15 violence. In 2017, the Chinese Medical Doctor Association (CMDA) released the latest  
16 version of “*White paper on medical practice in China*”, showing that 66% of Chinese  
17 physicians being involved in doctor-patient conflicts  
18 (www.cmda.net/u/cms/www/201807/06181247ffex.pdf). The increase of doctor-patient  
19 conflicts has a significant impact on physicians’ burnout, mental health, job satisfaction,  
20 and drop-off <sup>18,19</sup>. In our survey, nearly 40% of neurosurgeons have encountered hospital  
21 violence in the last five years, but the incidence among academic neurosurgeons was  
22 significantly lower than that among non-academic neurosurgeons. One possible  
23 explanation is that, as university hospitals and national medical centers, tertiary hospitals  
24 provide better security service. In addition, the public holds the view that surgeons in  
25 tertiary hospitals are more skillful and better equipped. It is believed that academic  
26 neurosurgeons may represent the highest level in this country, hence more respect and  
27 fewer conflicts are expected. Fortunately, the Chinese authority has realized the severity  
28 of this issue. A series of measures have been taken including a new initiative launched in  
29 April 2014 to guarantee normal medical order and the interests of Chinese doctors.  
30  
31  
32  
33  
34  
35  
36  
37  
38  
39  
40  
41  
42  
43  
44

45 The gap of pay, career development, and safety between academic and non-academic  
46 neurosurgeons has attracted an increasing number of young talents to work in tertiary  
47 hospitals. If the gap continues to exist or even widens further, an inevitable consequence  
48 is that patients would prefer to go to tertiary hospitals even if their disorders could be  
49 well treated in regional hospitals. This trend would lead to an imbalance in medical  
50 resources, increase the burden on tertiary hospitals, and affect the quality of medical care.  
51 In order to solve the problem, since 2016 the Chinese authority has introduced a new  
52  
53  
54  
55  
56  
57  
58  
59  
60

1  
2  
3 standardization training program, requiring all Chinese neurosurgeons, particular those  
4 working in regional hospitals, to finish an additional 4 years of specialist training. The  
5 intention of this reform is to enable all Chinese neurosurgeons to receive standardized  
6 training and to narrow their gap in skills and knowledge. In addition, the research  
7 management agencies, such as the Nature Science Foundation of China and many local  
8 foundations, have also provided increasing support for projects from regional hospitals.  
9 Yet it may require years to see the effect of these policies.

10  
11  
12  
13  
14  
15  
16  
17 This study has a few limitations. First of all, selection bias may exist during the process  
18 of the survey. Although the study was targeted random Chinese neurosurgeons,  
19 individuals who suffer from significant burnout or low morale were less likely to  
20 complete a voluntary survey. In other words, the survey may have provided more  
21 optimistic data. In addition, the questionnaires were distributed electronically via smart-  
22 phone APPs and web pages, which may recruit more young respondents than for elder  
23 surgeons. Also, for easier understanding and analysis, we simply considered  
24 neurosurgeons working in tertiary hospitals as the academic and those in regional  
25 hospitals as the non-academic. However, researches in regional hospitals are actually not  
26 down to zero. The Chinese healthcare system requires every doctor to publish at least two  
27 papers as one of the premise conditions for promotion, no matter in what kind of  
28 hospitals one may work. In major cities such as Beijing and Shanghai, the conditions for  
29 promotion are more demanding, requesting publication in high standard international  
30 journals. Therefore, neurosurgeons in regional hospitals also conduct clinical or basic  
31 researches, although these researches are usually with a limited amount and under the  
32 help of tertiary hospitals. However, under the aforementioned new policy, it is the fact  
33 that some non-academic neurosurgeons were devoted to research and have made  
34 remarkable achievements. Although their number may be limited, these “non-academic”  
35 neurosurgeons may stay as potential confounders in this anonymous survey.

## 51 **Conclusion**

52  
53 This study reveals the working status of Chinese neurosurgeons. It also illustrates the  
54 difference between academic and the non-academic neurosurgeons in China. Our data  
55  
56  
57  
58  
59  
60

1  
2  
3 suggest that Chinese neurosurgeons are under stress, particularly for those working in  
4 regional hospitals. We hope this study would promote reforms for better support and a  
5 safer working environment for Chinese neurosurgeons. We also wish this study may offer  
6 valuable information for medical students and young talents who would choose  
7 neurosurgery, a promising but challenging profession, as a career.  
8  
9  
10  
11  
12

### 13 **Funding**

14 This work was supported by Shanghai Municipal Science and Technology Commission  
15 project (16411955300, 18441903300), Shanghai Municipal Commission of Health and  
16 Family Planning project (201840063, 201801075), The Major and Develop Project of  
17 Chinese Ministry of Science and Technology (2017ZX09304005), the Public Medical  
18 Artificial Intelligence Training Platform (XX-RGZN-01-17-4684), and Shanghai  
19 Minhang Nature Science Foundation project (2018MHZ007).  
20  
21  
22  
23  
24  
25  
26

### 27 **Competing interests**

28 None declared.  
29  
30  
31

### 32 **Ethics approval**

33 The Ethics Review Committee of Huashan Hospital, Fudan University approved the  
34 study design and the collection of the data through the questionnaire.  
35  
36  
37  
38

### 39 **Data sharing statement**

40 No additional data are available  
41  
42  
43  
44

### 45 **Contributors**

46 JY and YS drafted the manuscript and was involved in the interpretation of the data. JG  
47 and JC performed statistical analyses. JY, JC and YS played a major role in the  
48 questionnaire development. All the authors read and approved the final manuscript.  
49  
50  
51  
52

### 53 **Acknowledgements:**

54  
55  
56  
57  
58  
59  
60

We thank Dr. Fei Zou, Dr. Jian Yu, Dr. Jianping Song, and Dr. Jingjing Xia for supporting this study.

## Reference

1. Ausman JI: The rise of Chinese neurosurgery and neurosurgery in the developing world, and scientific colonialism. **Surg Neurol** **67**:323-325, 2007
2. Chou SN: Perspectives in international neurosurgery: a glimpse of neurosurgery in China. **Neurosurgery** **3**:120-122, 1978
3. de Oliveira Vasconcelos Filho P, de Souza MR, Elias PE, D'Avila Viana AL: Physicians' job satisfaction and motivation in a public academic hospital. **Hum Resour Health** **14**:75, 2016
4. Fong TC, Ng SM: Measuring engagement at work: validation of the Chinese version of the Utrecht Work Engagement Scale. **Int J Behav Med** **19**:391-397, 2012
5. Hauptman JS, Chow DS, Martin NA, Itagaki MW: Research productivity in neurosurgery: trends in globalization, scientific focus, and funding. **J Neurosurg** **115**:1262-1272, 2011
6. Hulin CL, Smith PC: A linear model of job satisfaction. **Journal of Applied Psychology** **49**:209, 1965
7. Judge TA, Piccolo RF, Podsakoff NP, Shaw JC, Rich BL: The relationship between pay and job satisfaction: A meta-analysis of the literature. **Journal of Vocational Behavior** **77**:157-167, 2010
8. Klimo P, Jr., DeCuyper M, Ragel BT, McCartney S, Couldwell WT, Boop FA: Career satisfaction and burnout among U.S. neurosurgeons: a feasibility and pilot study. **World Neurosurg** **80**:e59-68, 2013
9. Kulikowski K, Sedlak P: Can you buy work engagement? The relationship between pay, fringe benefits, financial bonuses and work engagement. **Current Psychology**:1-11, 2017
10. McAbee JH, Ragel BT, McCartney S, Jones GM, Michael LM, 2nd, DeCuyper M, et al: Factors associated with career satisfaction and burnout among US neurosurgeons: results of a nationwide survey. **J Neurosurg** **123**:161-173, 2015
11. Schaufeli WB, Bakker AB: Job demands, job resources, and their relationship with burnout and engagement: a multi-sample study. **Journal of Organizational Behavior** **25**:293-315, 2004
12. Schaufeli WB, Salanova M, Gonzálezromá V, Bakker AB: The Measurement of Engagement and Burnout: A Two Sample Confirmatory Factor Analytic Approach. **Journal of Happiness Studies** **3**:71-92, 2002
13. Shanafelt TD, Balch CM, Bechamps GJ, Russell T, Dyrbye L, Satele D, et al: Burnout and career satisfaction among American surgeons. **Ann Surg** **250**:463-471, 2009
14. Smith PC, Kendall LM, Hulin CL: **The measurement of satisfaction in work and retirement.** . Chicago: Rand McNally, 1969



- 1
  - 2
  - 3
  - 4
  - 5
  - 6
  - 7
  - 8
  - 9
  - 10
  - 11
  - 12
  - 13
  - 14
  - 15
  - 16
  - 17
  - 18
  - 19
  - 20
  - 21
  - 22
  - 23
  - 24
  - 25
  - 26
  - 27
  - 28
  - 29
  - 30
  - 31
  - 32
  - 33
  - 34
  - 35
  - 36
  - 37
  - 38
  - 39
  - 40
  - 41
  - 42
  - 43
  - 44
  - 45
  - 46
  - 47
  - 48
  - 49
  - 50
  - 51
  - 52
  - 53
  - 54
  - 55
  - 56
  - 57
  - 58
  - 59
  - 60
15. Stringer C, Didham J, Theivananthampillai P: Motivation, pay satisfaction, and job satisfaction of front-line employees. **Qualitative Research in Accounting & Management** **8**:161-179, 2011
16. Tjink JK, Vergouwen AC, Smulders YM: Emotional exhaustion and burnout among medical professors; a nationwide survey. **BMC Med Educ** **14**:183, 2014
17. Wang C, Mao Y, Zhu JH, Zhou LF: The Department of Neurosurgery at Shanghai Huashan Hospital. **Neurosurgery** **62**:947-952; discussion 952-943, 2008
18. Wang Y, Fang M, Wang Y: How to decrease violence against doctors in China? **Int J Cardiol** **211**:66, 2016
19. Wang YX, Kaplar Z, L YT: AME survey-003 A1-part 2: the motivation factors of medical doctors in China. **Quant Imaging Med Surg** **5**:917-924, 2015
20. Wu D, Wang Y, Lam KF, Hesketh T: Health system reforms, violence against doctors and job satisfaction in the medical profession: a cross-sectional survey in Zhejiang Province, Eastern China. **BMJ Open** **4**:e006431, 2014
21. Zhang YQ, Xue C, Mao Y, You C: [Current status and development of Chinese neurosurgeons]. **Chinese Journal of Neurosurgery** **27**:217-219, 2011
22. Zhao JZ, Zhou LF, Zhou DB, Tang J, Zhang D: The status quo of neurosurgery in China. **Neurosurgery** **62**:516-520; discussion 520-511, 2008

**Table 1. Demographic & practice characteristics of respondents**

|                                                                      | All Neurosurgeons<br>(n=1202) |       | Academic (n=823) |       | Non-academic<br>(n=379) |       | p-value* |
|----------------------------------------------------------------------|-------------------------------|-------|------------------|-------|-------------------------|-------|----------|
|                                                                      | n                             | %     | n                | %     | n                       | %     |          |
| Gender                                                               |                               |       |                  |       |                         |       |          |
| Male                                                                 | 1117                          | 92.93 | 757              | 91.98 | 360                     | 94.99 | 0.069    |
| Female                                                               | 85                            | 7.07  | 66               | 8.02  | 19                      | 5.01  | 0.069    |
| Age                                                                  |                               |       |                  |       |                         |       |          |
| ≤35                                                                  | 586                           | 48.75 | 406              | 49.33 | 180                     | 47.49 | 0.58     |
| 36-45                                                                | 439                           | 36.52 | 307              | 37.30 | 132                     | 34.83 | 0.41     |
| 46-55                                                                | 158                           | 13.14 | 99               | 12.03 | 59                      | 15.57 | 0.092    |
| ≥56                                                                  | 19                            | 1.58  | 11               | 1.34  | 8                       | 2.11  | 0.47     |
| Marital status                                                       |                               |       |                  |       |                         |       |          |
| Married                                                              | 956                           | 79.53 | 630              | 76.55 | 326                     | 86.02 | <0.01    |
| Unmarried                                                            | 196                           | 16.31 | 164              | 19.93 | 32                      | 8.44  | <0.01    |
| Divorced                                                             | 50                            | 4.16  | 29               | 3.52  | 21                      | 5.54  | 0.11     |
| Number of kids<br>( married only)                                    |                               |       |                  |       |                         |       |          |
| 0                                                                    | 80                            | 8.37  | 74               | 11.75 | 6                       | 1.84  | <0.01    |
| 1                                                                    | 589                           | 61.61 | 392              | 62.22 | 197                     | 60.43 | 0.59     |
| ≥2                                                                   | 287                           | 30.02 | 164              | 26.03 | 123                     | 37.73 | <0.01    |
| Nature of current<br>employer                                        |                               |       |                  |       |                         |       |          |
| Public                                                               | 1105                          | 91.93 | 794              | 96.48 | 311                     | 82.06 | <0.01    |
| Private                                                              | 97                            | 8.07  | 29               | 3.52  | 68                      | 17.94 | <0.01    |
| Professional status                                                  |                               |       |                  |       |                         |       |          |
| Intern                                                               | 36                            | 3.00  | 25               | 3.04  | 11                      | 2.90  | 0.99     |
| Resident                                                             | 336                           | 27.95 | 241              | 29.28 | 95                      | 25.07 | 0.13     |
| Attending doctor                                                     | 509                           | 42.35 | 342              | 41.56 | 167                     | 44.06 | 0.41     |
| Senior/Chief                                                         | 321                           | 26.71 | 215              | 26.12 | 106                     | 27.97 | 0.50     |
| Working hours per<br>week (hours, mean ±sd)                          |                               |       |                  |       |                         |       |          |
| Total                                                                | 63.91±11.04                   | /     | 64.39±9.63       | /     | 61.92±8.34              | /     | <0.01    |
| Clinic                                                               | 58.19±10.34                   | /     | 56.17±9.12       | /     | 61.42±7.92              | /     | <0.01    |
| Research                                                             | 5.72±3.67                     | /     | 8.21±4.64        | /     | 0.53±0.36               | /     | <0.01    |
| Annual income<br>(10,000RMB)                                         |                               |       |                  |       |                         |       |          |
| <6                                                                   | 202                           | 16.81 | 121              | 14.70 | 81                      | 21.37 | <0.01    |
| 6-10                                                                 | 384                           | 31.95 | 231              | 28.07 | 153                     | 40.37 | <0.01    |
| 11-15                                                                | 366                           | 30.45 | 264              | 32.08 | 102                     | 26.91 | 0.071    |
| 16-20                                                                | 172                           | 14.31 | 140              | 17.01 | 32                      | 8.44  | <0.01    |
| ≥20                                                                  | 78                            | 6.49  | 67               | 8.14  | 11                      | 2.90  | <0.01    |
| Experience or witness<br>of hospital violence in<br>the last 5 years |                               |       |                  |       |                         |       |          |
| Yes                                                                  | 456                           | 37.94 | 289              | 35.12 | 167                     | 44.06 | <0.01    |
| Encouraging child to<br>become a doctor                              |                               |       |                  |       |                         |       |          |
| Yes                                                                  | 80                            | 6.66  | 55               | 6.68  | 25                      | 6.60  | 0.99     |
| No                                                                   | 876                           | 72.88 | 573              | 69.62 | 303                     | 79.95 | <0.01    |
| Not sure                                                             | 246                           | 20.47 | 195              | 23.69 | 51                      | 13.46 | <0.01    |

\* The p-values indicate the difference between the academic and non-academic neurosurgeons. A p-value less than 0.05 is considered as statistical significance.

**Table 2. Burnout measured by MBI**

| Burnout Subscales       | All Neurosurgeons<br>(n=1202) |       | Academic<br>(n=823) |       | Non-academic<br>(n=379) |       | p-value* |
|-------------------------|-------------------------------|-------|---------------------|-------|-------------------------|-------|----------|
|                         | n                             | %     | n                   | %     | n                       | %     |          |
| Emotional Exhaustion    |                               |       |                     |       |                         |       |          |
| Low                     | 195                           | 16.22 | 136                 | 16.52 | 59                      | 15.57 | 0.68     |
| Intermediate            | 573                           | 47.67 | 414                 | 50.30 | 159                     | 41.95 | <0.01    |
| High                    | 434                           | 36.11 | 273                 | 33.17 | 161                     | 42.48 | <0.01    |
| Depersonalization       |                               |       |                     |       |                         |       |          |
| Low                     | 543                           | 45.17 | 394                 | 47.87 | 149                     | 39.31 | <0.01    |
| Intermediate            | 303                           | 25.21 | 253                 | 30.74 | 50                      | 13.19 | <0.01    |
| High                    | 356                           | 29.62 | 176                 | 21.39 | 180                     | 47.49 | <0.01    |
| Personal Accomplishment |                               |       |                     |       |                         |       |          |
| Low                     | 533                           | 44.34 | 363                 | 44.11 | 170                     | 44.85 | 0.81     |
| Intermediate            | 518                           | 43.09 | 376                 | 45.69 | 142                     | 37.47 | <0.01    |
| High                    | 151                           | 12.56 | 84                  | 10.21 | 67                      | 17.68 | <0.01    |
| Burnout                 | 535                           | 44.51 | 312                 | 37.91 | 223                     | 58.84 | <0.01    |

\* The p-values indicate the difference between the academic and non-academic neurosurgeons. A p-value less than 0.05 is considered as statistical significance.

**Table 3. Job satisfaction measured by JDI**

| JDI Subscales | All Neurosurgeons<br>(n=1202) |       | Academic<br>(n=823) |       | Non-academic<br>(n=379) |       | p-value*        |
|---------------|-------------------------------|-------|---------------------|-------|-------------------------|-------|-----------------|
|               | Mean                          | Sd    | Mean                | Sd    | Mean                    | Sd    |                 |
| JDI Score     | 102.60                        | 36.63 | 107.04              | 36.48 | 92.95                   | 35.12 | <b>&lt;0.01</b> |
| Work Itself   | 24.27                         | 11.76 | 24.55               | 11.93 | 22.30                   | 12.49 | <b>&lt;0.01</b> |
| Pay           | 7.44                          | 4.22  | 7.60                | 4.09  | 7.11                    | 4.84  | 0.059           |
| Promotion     | 6.73                          | 4.55  | 7.09                | 4.29  | 5.92                    | 4.99  | <b>&lt;0.01</b> |
| Supervision   | 25.44                         | 13.35 | 27.14               | 13.83 | 21.76                   | 11.41 | <b>&lt;0.01</b> |
| Coworker      | 24.53                         | 10.60 | 25.32               | 10.76 | 24.83                   | 10.07 | 0.45            |

\* The p-values indicate the difference between the academic and non-academic neurosurgeons. A p-value less than 0.05 is considered as statistical significance.

**Table 4. Job engagement measured by UWES**

| UWES Subscales | All Neurosurgeons<br>(n=1202) |       | Academic<br>(n=823) |       | Non-academic<br>(n=379) |       | p-value*        |
|----------------|-------------------------------|-------|---------------------|-------|-------------------------|-------|-----------------|
|                | Mean                          | Sd    | Mean                | Sd    | Mean                    | Sd    |                 |
| UWES Score     | 61.27                         | 26.21 | 62.52               | 25.53 | 58.55                   | 27.49 | <b>0.015</b>    |
| Vigor          | 22.04                         | 9.48  | 22.39               | 9.37  | 21.28                   | 9.69  | 0.059           |
| Dedication     | 18.03                         | 8.83  | 18.57               | 8.48  | 16.86                   | 9.46  | <b>&lt;0.01</b> |
| Absorption     | 21.20                         | 9.75  | 21.57               | 9.55  | 20.41                   | 10.13 | 0.057           |

\* The p-values indicate the difference between the academic and non-academic neurosurgeons. A p value less than 0.05 is considered as statistical significance.

**Table 5. Multivariate analysis on burnout**

|                                                                | All Neurosurgeons (n=1202) |            |                 | Academic(n=823) |            |                 | Non-academic(n=379) |            |                 |
|----------------------------------------------------------------|----------------------------|------------|-----------------|-----------------|------------|-----------------|---------------------|------------|-----------------|
|                                                                | OR                         | 95% CI     | p-value         | OR              | 95% CI     | p-value         | OR                  | 95% CI     | p value         |
| Gender                                                         |                            |            |                 |                 |            |                 |                     |            |                 |
| Male                                                           | 1.43                       | 0.91-2.26  | 0.14            | 1.44            | 0.84-2.49  | 0.23            | 1.04                | 0.41-2.65  | 0.99            |
| Age                                                            |                            |            |                 |                 |            |                 |                     |            |                 |
| ≤35                                                            | 1.07                       | 0.85-1.35  | 0.55            | 1.11            | 0.84-1.47  | 0.46            | 1.045               | 0.69-1.58  | 0.82            |
| 36-45                                                          | 1.20                       | 0.95-1.52  | 0.13            | 1.06            | 0.79-1.12  | 0.70            | 1.75                | 1.12-2.71  | <b>0.013</b>    |
| ≥46                                                            | 0.61                       | 0.43-0.85  | <b>&lt;0.01</b> | 0.70            | 0.45-1.08  | 0.10            | 0.39                | 0.23-0.69  | <b>&lt;0.01</b> |
| Marital status                                                 |                            |            |                 |                 |            |                 |                     |            |                 |
| Married                                                        | 0.71                       | 0.54-0.94  | <b>0.018</b>    | 0.54            | 0.39-0.75  | <b>&lt;0.01</b> | 1.02                | 0.56-1.83  | 0.99            |
| Unmarried                                                      | 0.92                       | 0.68-1.26  | 0.61            | 1.45            | 1.03-20.6  | <b>0.033</b>    | 0.29                | 0.13-0.62  | <b>&lt;0.01</b> |
| Divorced                                                       | 7.02                       | 2.37-15.08 | <b>&lt;0.01</b> | 4.53            | 1.98-10.37 | <b>&lt;0.01</b> | 7.52                | 1.84-28.43 | <b>&lt;0.01</b> |
| Number of kids (married only)                                  |                            |            |                 |                 |            |                 |                     |            |                 |
| 0                                                              | 0.48                       | 0.29-0.80  | <b>&lt;0.01</b> | 0.78            | 0.46-1.33  | 0.43            | 0.17                | 0.075-0.38 | <b>&lt;0.01</b> |
| 1                                                              | 1.47                       | 1.12-1.92  | <b>&lt;0.01</b> | 1.16            | 0.83-1.63  | 0.39            | 2.46                | 1.56-3.98  | <b>&lt;0.01</b> |
| ≥2                                                             | 0.83                       | 0.63-1.11  | 0.21            | 0.95            | 0.65-1.38  | 0.20            | 0.49                | 0.31-0.77  | <b>&lt;0.01</b> |
| Nature of current employer                                     |                            |            |                 |                 |            |                 |                     |            |                 |
| Public hospital                                                | 1.39                       | 0.91-2.14  | 0.13            | 0.36            | 0.16-0.77  | <b>0.010</b>    | 5.37                | 2.99-9.67  | <b>&lt;0.01</b> |
| Job titles                                                     |                            |            |                 |                 |            |                 |                     |            |                 |
| Intern/resident                                                | 0.88                       | 0.69-1.12  | 0.29            | 0.99            | 0.74-1.33  | 0.99            | 0.82                | 0.52-1.28  | 0.41            |
| Attending doctor                                               | 1.40                       | 1.12-1.76  | <b>&lt;0.01</b> | 1.05            | 0.79-1.40  | 0.73            | 2.57                | 1.67-3.96  | <b>&lt;0.01</b> |
| Senior/Chief                                                   | 0.74                       | 0.57-0.97  | <b>0.031</b>    | 0.94            | 0.67-1.32  | 0.71            | 0.41                | 0.25-0.64  | <b>&lt;0.01</b> |
| Working hours per week                                         |                            |            |                 |                 |            |                 |                     |            |                 |
| ≤55                                                            | 0.49                       | 0.38-0.63  | <b>&lt;0.01</b> | 0.59            | 0.33-0.61  | <b>&lt;0.01</b> | 0.68                | 0.43-1.08  | 0.10            |
| 56-70                                                          | 0.63                       | 0.49-0.81  | <b>&lt;0.01</b> | 0.47            | 0.34-0.65  | <b>&lt;0.01</b> | 0.99                | 0.64-1.55  | 0.99            |
| ≥71                                                            | 3.12                       | 2.43-3.99  | <b>&lt;0.01</b> | 4.56            | 3.33-6.22  | <b>&lt;0.01</b> | 1.39                | 0.91-2.12  | 0.13            |
| Annual income (10,000RMB)                                      |                            |            |                 |                 |            |                 |                     |            |                 |
| <10                                                            | 1.85                       | 1.47-2.32  | <b>&lt;0.01</b> | 1.82            | 1.37-2.43  | <b>&lt;0.01</b> | 1.33                | 0.88-2.03  | 0.17            |
| 11-15                                                          | 0.76                       | 0.59-0.98  | <b>0.033</b>    | 0.63            | 0.46-0.86  | <b>&lt;0.01</b> | 1.32                | 0.82-2.11  | 0.24            |
| ≥16                                                            | 0.55                       | 0.41-0.74  | <b>&lt;0.01</b> | 0.77            | 0.55-1.07  | 0.12            | 0.29                | 0.15-0.58  | <b>&lt;0.01</b> |
| Experience or witness of hospital violence in the last 5 years |                            |            |                 |                 |            |                 |                     |            |                 |
| Yes                                                            | 1.52                       | 1.18-2.24  | <b>&lt;0.01</b> | 1.42            | 1.15-2.07  | <b>0.011</b>    | 2.03                | 1.50-3.25  | <b>&lt;0.01</b> |

\* A p-value less than 0.05 is considered as statistical significance.

# BMJ Open

## Academic vs. non-academic neurosurgeons in China: a comparison in terms of workload, burnout, and engagement

|                                 |                                                                                                                                                                                                                                                                                                                                                                                              |
|---------------------------------|----------------------------------------------------------------------------------------------------------------------------------------------------------------------------------------------------------------------------------------------------------------------------------------------------------------------------------------------------------------------------------------------|
| Journal:                        | <i>BMJ Open</i>                                                                                                                                                                                                                                                                                                                                                                              |
| Manuscript ID                   | bmjopen-2018-028309.R1                                                                                                                                                                                                                                                                                                                                                                       |
| Article Type:                   | Original research                                                                                                                                                                                                                                                                                                                                                                            |
| Date Submitted by the Author:   | 17-Jun-2019                                                                                                                                                                                                                                                                                                                                                                                  |
| Complete List of Authors:       | Yu, Jinli; Huashan Hospital, Fudan University, Department of International Education and cooperation<br>Gao, Jiming; Huashan Hospital Fudan University, Department of Medical Education<br>Chen, Junyan; East China Institute of Telecommunications, The Artificial Intelligence and Big Data Business Division<br>Sun, Yirui; Huashan Hospital Fudan University, Department of Neurosurgery |
| <b>Primary Subject Heading</b>: | Health services research                                                                                                                                                                                                                                                                                                                                                                     |
| Secondary Subject Heading:      | Health policy, Medical education and training, Medical management                                                                                                                                                                                                                                                                                                                            |
| Keywords:                       | Neurosurgeon, China, academic, burnout, job satisfaction, engagement                                                                                                                                                                                                                                                                                                                         |
|                                 |                                                                                                                                                                                                                                                                                                                                                                                              |

SCHOLARONE™  
Manuscripts

# Academic vs. non-academic neurosurgeons in China: a comparison in terms of workload, burnout, and engagement

Jinli Yu MA.<sup>1,2</sup>, Jiming Gao MPA.<sup>3</sup>, Junyan Chen Ph.D<sup>4</sup>, Yirui Sun MD. Ph.D<sup>5</sup>

1. Department of International Education and cooperation, Huashan Hospital, Fudan University
2. Continuing Medical Education, Harvard Medical School
3. Department of Medical Education, Huashan Hospital, Fudan University
4. The Artificial Intelligence and Big Data Business Division, East China Institute of Telecommunications
5. Department of Neurosurgery, Huashan Hospital, Fudan University.

## Corresponding author:

Yirui Sun MD. Ph.D

Email: yirui.sun@live.cn

Department of Neurosurgery, Huashan Hospital, Fudan University

12 Urumqi Middle Road, Shanghai, China, 200040

## Keywords:

Neurosurgeon; China; academic; burnout; job satisfaction; engagement.

**Running Title:** Academic vs. Non-academic neurosurgeons in China



## Abstract

**Objectives:** Chinese neurosurgery has made great progress during the past decades, yet little is known about the working status of neurosurgeons. This study aimed to evaluate the difference between academic and non-academic neurosurgeons, focusing on their professional burnout, job satisfaction, and work engagement.

**Design:** Cross-sectional nationwide survey.

**Study setting:** The survey was conducted in China between 2017 and 2018.

**Participants:** A total number of 823 academic neurosurgeons and 379 non-academic neurosurgeons participated in this study.

**Outcome measures:** Professional burnout, job satisfaction, and work engagement were assessed using the Maslach Burnout Inventory, the Job Descriptive Index and the Utrecht Work Engagement Scale, respectively.

**Results:** The majority of respondents were male (92.93%), less than 45 years old (85.27%), and married (79.53%). Chinese neurosurgeons worked  $63.91 \pm 11.04$  hours per week, and approximately 45% experienced burnout. Compared with non-academic respondents, academic neurosurgeons had longer working hours ( $p < 0.01$ ), higher income ( $p < 0.01$ ), and were less willing to get married ( $p < 0.01$ ). In addition, they showed a lower degree of burnout ( $p < 0.01$ ), a higher level of job satisfaction ( $p < 0.01$ ) and were more enthusiastic at work ( $p = 0.015$ ). Multivariate regression analyses indicated that divorced (OR 7.02, 95% CI 2.37-15.08) and workplace violence (OR 1.52, 95% CI 1.18-2.24) were associated with burnout for both academic and non-academic respondents. Long working hours ( $\geq 71$  hours per week) and low annual income ( $< 100,000$  RMB) were risk factors for burnout among academic neurosurgeons. For non-academic neurosurgical surgeons (age 36-45), working as attending doctors, serving in public hospitals, and having the first house-living child were all closely related to the incidence of burnout.

**Conclusions:** Chinese neurosurgeons are under significant stress particularly for the non-academic neurosurgeons. Offering better opportunities for training, promotion, higher income, and safer working environments could be solutions to relieve burnout and improve career satisfaction and engagement.

**Registration:** Chinese Clinical Trial Registry (ChiCTR1800014762).

### Strengths and limitations of this study:

This is the first national survey to assess the working status of Chinese neurosurgeons.

Worldwide common questionnaires including MBI-HSS, JDI, and UEWS were applied in the survey. The results would facilitate a comparison to previous and future studies.

Subgroup analyses were performed to illustrate burnout levels among junior and senior neurosurgeons.

Despite a large number (1202) of respondents, the study covered approximately 16% of Chinese neurosurgeons. Selection bias may exist.

A comparison to other clinical specialists would also be interesting for future investigations.

### Introduction

Chinese neurosurgery has a relatively short history. The first formal record of neurosurgical procedure could be traced back to 1950, when the first craniotomy operation was performed by Dr. Kefei Shan and Yuquan Shi in Shanghai<sup>1</sup>. At that time, Chinese neurosurgical facilities started with only a few pioneer surgeons and limited beds<sup>1, 2</sup>. A remarkable milestone in the development of Chinese neurosurgery was the foundation of the Chinese Neurosurgical Society (CNS) in 1986<sup>3, 4</sup>. To date, modern neurosurgical clinic centers have been established in many major cities, with some performing over 8,000 sophisticated operations annually<sup>1, 4</sup>. According to the World Federation of Neurosurgical Societies (WFNS) and the Chinese Neurosurgeon Society (CNS)<sup>5</sup>, China has approximately 11,000 registered neurosurgeons, which is the largest group of neurosurgeons in the world. In addition, Chinese neurosurgery has made remarkable progress in academic research. It is indicated that China has contributed approximately 4.2% of published neurosurgical research in the world (ranked fifth in the world behind U.S, Japan, Germany, and U.K), and emerged as the only country among the top 5 with substantial growth of neurosurgical research productivity (121.9% ± 9.98% per year)<sup>6</sup>.

Despite the remarkable achievement, to our knowledge, there have been few published studies revealing the working status of Chinese neurosurgeons. The training program and

1  
2  
3 career path of a neurosurgeon in China are different from that in the Western world. In  
4 China, the healthcare system involves hospitals of three levels. General practitioners  
5 usually work in level I hospitals, also known as community health centers. Level I  
6 hospitals provide primary health care and are not equipped with neurosurgical facilities.  
7  
8 The Level II hospitals, also known as regional medical centers, recruit specialists  
9 including neurosurgeons. Routine neurosurgical operations can be performed in these  
10 hospitals. The level III (tertiary) hospitals are usually university teaching hospitals and  
11 national medical centers. Neurosurgeons working in tertiary hospitals are required to not  
12 only take care of complex cases (usually transferred from regional hospitals), but also  
13 conduct clinical/basic research, teaching, and tutoring. Therefore, the neurosurgical  
14 surgeons working in tertiary hospitals are usually considered academic neurosurgeons  
15 and those working in regional hospitals as the non-academic. For young doctors who are  
16 interested in neurosurgery, after graduation from medical school, they are recruited to  
17 work either in a regional or tertiary hospital and start their training as neurosurgeon  
18 residents. The updated (since 2003) training program requires a neurosurgeon resident to  
19 complete two stages (5-7 years in total) standardized training before they can apply for  
20 senior positions such as attending and then consulting neurosurgeons. Although young  
21 trainees may apply to work for a different hospital (e.g from a non-academic to academic  
22 center), the number of successful applicants is very limited. A brief introduction of the  
23 Chinese neurosurgery system and training system can be found elsewhere <sup>4</sup>.

24  
25  
26  
27  
28  
29  
30  
31  
32  
33  
34  
35  
36  
37  
38  
39 Due to the inherent difference of the academic and non-academic medical specialists in  
40 China, a natural belief holds that the academic neurosurgeons are under significant stress  
41 as a result of additional responsibilities. However, during our previous study to assess the  
42 working status of Chinese physicians from various specialties, subgroup analyses  
43 suggested that surgeons working in regional hospitals were actually more stressed  
44 (submitted and under review). Nevertheless, in-depth investigations could not be  
45 performed due to limited case numbers. Here we reported the results on a national survey  
46 on Chinese neurosurgeons. The focus of this study is to reveal the working status, as well  
47 as the difference between academic and non-academic of neurosurgeons. Detailed  
48 methods and results are described below.

## Materials and Methods

### *Study Design and Questionnaires*

From June 2017 to September 2018, a national online survey was conducted in mainland China using both smartphone apps and website visiting under the support of the East Institution of China Academy of Information and Communications Technology. This study was part of a two-phase national survey on the working and living status of Chinese physicians, which was approved and registered with the Chinese Clinical Trial Registry (ChiCTR1800014762). The Phase I investigation was conducted between June 2017 and February 2018, recruiting 1167 physicians of various specialties. This part focused on the comparison between specialties (submitted elsewhere and under review). The phase II investigation was conducted between March and September 2018, in which the working and living status of each specialty is further investigated. Answers from resident/attending/senior neurosurgeons in both phase I and II investigations were analyzed in this study. Potential respondents were invited to complete the online questionnaires via mailing lists of the Shanghai Medical Doctor Association, the national continuing education platform “Neurosurgery News”, and the professional networks of the authors. Neurosurgeons were also invited during national or local conferences via two-dimensional barcodes scanning. An introduction of the research purpose and methods was provided at the beginning of the online survey. Informed consent was received electronically from each respondent. All answers were collected anonymously. To avoid repeated participation, each IP address was restricted to fill out the questionnaire once.

The questionnaire consisted of 147 closed-end questions, organized in sections including demographic and practice characteristics, professional burnout, job satisfaction, and work engagement. Most questions were derived from the well-established and standard scales (see below). A few questions were derived from previous studies<sup>7-9</sup> or were developed by the authors. Details for each section are described as follows.

### *Demographic and practice characteristics*

1  
2  
3 Respondents were asked to provide gender, marital and family status, job titles,  
4 nature of employers, weekly working hours, annual income, experience of workplace  
5 violence, and whether a respondent would encourage his/her kid(s) to become a doctor.  
6  
7 Neurosurgical respondents working in tertiary hospitals were considered academic  
8 neurosurgeons, and those from regional hospitals were considered as non-academic  
9 neurosurgeons.  
10  
11  
12  
13  
14

### 15 *Burnout*

16 Professional burnout was measured by the 22-item Maslach Burnout Inventory-Human  
17 Services Survey (MBI-HSS). In previous studies on professional burnout, heterogeneities  
18 have been recognized regarding the different tools and questionnaire versions. However,  
19 the original 22-item version of MBI-HSS is still one of the most commonly used tools to  
20 measure burnout<sup>10</sup>. The 22 items covering three dimensions: Emotional Exhaustion (EE, 9  
21 items), Depersonalization (DP, 5 items), and Personal Accomplishments (PA, 8 items).  
22 Answers to each question were designed according to the frequency of a respondent's  
23 encountering situations on a 7-point scale, from "never" (0 points) to "daily" (6 points).  
24 MBI scores of each dimension were further graded as high, intermediate, or low (low  
25 EE $\leq$ 18; high EE $\geq$ 27; low DP $\leq$ 5, high DP $\geq$ 10; low PA $\leq$ 33; high PA $\geq$ 40)<sup>11</sup>. A respondent  
26 would be considered burnt out if he/she had high scores in the Emotional Exhaustion or  
27 Depersonalization assessment<sup>11-13</sup>. The internal consistency of the questionnaire was  
28 presented as Cronbach's  $\alpha$  values for each section (0.91, 0.90, and 0.85, respectively).  
29  
30  
31  
32  
33  
34  
35  
36  
37  
38  
39  
40

### 41 *Job satisfaction*

42 The respondents' job satisfaction was assessed by the Index of Job Satisfaction (JDI).  
43 The JDI questionnaire contained questions on five independent dimensions, namely,  
44 Work Itself (22 items), Pay (9 items), Promotion (7 items), Co-workers (11 items), and  
45 Supervision (14 items)<sup>14, 15</sup>. Each item was scored Yes=3, ?=1, and No=0, with  
46 negatively worded items being reverse-coded. A JDI score for each respondent was  
47 calculated as the sum of all his/her answers, with the scores of the Promotion and Pay  
48 sections being multiplied by 2. The Cronbach's  $\alpha$  values of the 5 JDI subscales were 0.89,  
49 0.94, 0.88, 0.90, and 0.87, respectively.  
50  
51  
52  
53  
54  
55  
56  
57  
58  
59  
60

### *Work engagement*

Work engagement was measured using the 17-item Utrecht Work Engagement Scale (UWES). The UWES had three subscales: Vigor (6 items), Dedication (5 items) and Absorption (6 items). All items were rated on a 7-point Likert scale (0-6). The sum of all items was used as a UWES score<sup>16-18</sup>. The internal consistency for the UWES questionnaire was presented as a Cronbach's  $\alpha$  value of 0.85.

### *Data analysis*

Data analysis was performed using SPSS 18 (SPSS Inc., Chicago, U.S.). Quantitative data were presented as means  $\pm$  standard deviations (SD). Shapiro-Wilk W test and F test were performed for normality and homogeneity. Independent samples t-test, Wilcoxon rank-sum test, and one-way analysis of variance (ANOVA) were used for the quantitative data of independent groups. Chi-square and Fisher exact tests were used for nominal variables. Statistical significance was considered with a two-tailed p-value less than 0.05.

### *Patient and Public Involvement*

No patients were involved in this study. The public has not been involved in the development of the research or in the study design. The study results will be disseminated to respondents via newsletters and publications.

## **Results**

### *Demographic & practice characteristics of respondents*

A total number of 1,202 neurosurgeons completed the survey. Considering the fact that approximately two-thirds of 11,000 registered neurosurgeons in China have received proper training and are active<sup>19</sup>, the pool of responding neurosurgeons in this study may represent approximately 16% of Chinese neurosurgeons.

The demographic and practice characteristics of responding neurosurgeons were summarized in Table 1. Their mean age was  $34.32 \pm 7.21$  years, with a male to female ratio of 13.14:1. Among the respondents, 956 (79.53%) were married and 50 (4.16%)

1  
2  
3 were divorced. Approximately three-quarters of neurosurgeons had home-living children,  
4 and 23.87% (30.02% of the married) had more than one child. The majority (91.93%) of  
5 responding neurosurgeons worked in public hospitals. They worked an average of  
6 63.91±11.04 hours a week, with an annual income of 11.13±4.85<sup>10</sup><sup>4</sup> RMB  
7 (approximately 16,000±6,990 USD). Interns, residents, attending doctors, and  
8 senior/chief neurosurgeons constituted 3.00%, 27.95%, 42.35%, and 26.71% of all  
9 respondents, respectively. Over one-third (37.94%) of surveyed neurosurgeons claimed  
10 that they had experienced or witnessed workplace violence against doctors or other  
11 medical workers in the last 5 years. Only 6.6% of respondents would encourage their  
12 offspring to become a doctor.  
13  
14  
15  
16  
17  
18  
19  
20  
21

22 Among the 1202 respondents, there were 823 (68.47%) academic and 379 (31.53%) non-  
23 academic neurosurgeons. The two groups had no statistical difference in terms of gender,  
24 age, marital status, and job titles. However, a larger proportion of academic  
25 neurosurgeons were single compared to the non-academic (19.93% vs. 8.44% p<0.01),  
26 and the former preferred to have fewer children after marriage (Table 1). While the  
27 majority (91.93%) of academic neurosurgeons were working in public hospitals, nearly  
28 18% of non-academic neurosurgeons chose to work in private medical facilities (p<0.01,  
29 Table 1). Both academic and non-academic neurosurgeons spent approximately 60 hours  
30 per week on clinical work (56.17±9.12 vs. 61.42±7.92 hours, p<0.01). For the academic  
31 neurosurgeons, they required additional 8.21±4.64 hours per week on teaching and  
32 research such as university lectures, lab work, clinical trials, paper writing, etc., making  
33 their average working hours significantly longer than that of the non-academic (p<0.01,  
34 Table 1). Accordingly, the average annual income of the academic neurosurgeons was  
35 statistically higher than that of their non-academic colleagues (11.37±4.29<sup>10</sup><sup>4</sup> RMB,  
36 16,300±6,100 USD vs. 10.02±5.21<sup>10</sup><sup>4</sup> RMB, 14,300±7,500 USD, p<0.01). The gap in  
37 income was also reflected by the difference in proportions of high-income individuals  
38 (Table 1). Some other notable difference included that the non-academic neurosurgeons  
39 had a higher risk of experiencing or witnessing workplace violence (44.06% vs. 35.12%,  
40 p<0.01). Additionally, it is worth noting that the academic neurosurgeons were less likely  
41 to encourage their child(ren) to become a doctor (p<0.01) (Table 1).  
42  
43  
44  
45  
46  
47  
48  
49  
50  
51  
52  
53  
54  
55  
56  
57  
58  
59  
60

### *Career Burnout*

Career Burnout was assessed by the 22-item MBI-HSS questionnaire and summarized in Table 2. Overall, 44.51% of responding neurosurgeons were burnout. There were 36.11% of respondents showing high levels of Emotional Exhaustion, 29.62% with high Depersonalization and 12.26% with a low sense of Personal Accomplishment (Table 2). Although the academic neurosurgeons had longer weekly working hours and more workload, the incidence of burnout was significantly lower among the academic neurosurgeons (37.91% vs. 58.84%,  $p<0.01$ ). In fact, the academic neurosurgeons scored better in all three assessed dimensions ( $p<0.01$ ,  $p<0.01$ , and  $p<0.01$ , respectively, Table 2). Additional analysis was performed to illustrate the difference in burnout rate among neurosurgeons with different job titles. Table 3 indicates that the non-academic neurosurgeons at all levels had higher burnout rates than their academic colleagues. In addition, for both academic and non-academic respondents, the senior/chief neurosurgeons were less likely being burnout than intern/resident or attending neurosurgeons (Table 3).

### *Job satisfaction*

Job satisfaction was measured by JDI and the five subscales (Table 4). The mean JDI score for all surveyed neurosurgeons was  $102.60\pm 36.63$ . Previous studies have been conducted in other countries using JDI to measure job satisfaction. For example, Rahnavard et al., and Lee et al., reported a mean JDI between 175-190 of mental health professionals and nursing staff<sup>20, 21</sup>. A JDI of 102 of this study is significantly lower than the scores reported by other authors, indicating a lower level of job satisfaction. Interestingly, the academic neurosurgeons showed significantly higher scores (being more satisfied) when they were asked to comment on Work Itself, Promotion, and Supervision ( $p<0.01$ ,  $p<0.01$ , and  $p<0.01$ , respectively, Table 4). There was no statistical difference in the comments on Pay and Coworker ( $p=0.059$  and  $0.45$ , respectively, Table 3).

### *Work engagement*



1  
2  
3 The UWES scores indicated the difference in work engagement between the academic  
4 and non-academic neurosurgeons (Table 5). Overall, the academic neurosurgeons scored  
5 higher (being more enthusiastic for work) than their non-academic colleagues ( $p=0.015$ ).  
6 For UWES subscales, academic neurosurgeons were more dedicated to work ( $p<0.01$ ).  
7 Yet the academic and non-academic neurosurgeons showed no difference in the Vigor  
8 and Absorption assessment ( $p=0.057$ ,  $p=0.059$ , respectively, Table 5).  
9  
10  
11  
12  
13  
14

### 15 *Multivariate analysis*

16 Multivariate regression analyzation indicated that, for both academic and non-academic  
17 neurosurgeons, being divorced, having one (or the first) home-living child, working as  
18 attending doctors, prolonged working hours ( $\geq 71$  hours per week), low annual income  
19 ( $<100,000$  RMB,  $\sim 14,400$  USD), and workplace violence were significantly related to  
20 professional burnout (Table 6). For non-academic neurosurgeons, working in public  
21 hospitals was an independent risk factor for burnout (OR 5.37, 95% CI 2.969-9.67,  
22  $p<0.01$ ). In addition, surgeons' age, number of home-living children, and job titles were  
23 associated with burnout among non-academic neurosurgeons but not the academic  
24 respondents (Table 6). Subgroup analysis also indicated that academic neurosurgeons  
25 may have a relatively lower expectation of income. While the annual income between  
26 110,000-150,000 RMB (14,400-21,600 USD) was related to professional burnout among  
27 the academic neurosurgeons (OR 0.63, 95% CI 0.46-0.86,  $p<0.01$ ), a similar association  
28 was only observed when the annual income exceeded 160,000 RMB (23,000 USD)  
29 among the non-academic respondents (OR 0.29, 95% CI 0.15-0.58,  $p<0.01$ , Table 6).  
30  
31  
32  
33  
34  
35  
36  
37  
38  
39  
40  
41  
42

### 43 **Discussion**

44 There is no doubt that Chinese neurosurgery has made a remarkable improvement in the  
45 past decades<sup>3, 4, 6</sup>. On the stage of today's neurosurgery, the voice of the Chinese can  
46 often be heard. In spite of the fact that Chinese neurosurgery has shown progresses not  
47 only in the case numbers and operating techniques but also in the amount and quality of  
48 academic research, little attention has been paid to the working status of Chinese  
49 neurosurgical surgeons to date.  
50  
51  
52  
53  
54  
55  
56  
57  
58  
59  
60

1  
2  
3 In this study, a national survey was conducted to address this issue. Our survey indicates  
4 that Chinese neurosurgeons are under great pressure. Vast workload, prolonged working  
5 hours, high incidence of burnout and low job satisfaction have been noted among all  
6 levels of neurosurgeons. Professional burnout has been previously investigated among  
7 neurosurgeons in the U.S. (27%-56.7% of neurosurgeons being burnout) <sup>11, 13</sup> and in  
8 Europe (one-quarter of neurosurgeons being burnout) <sup>22</sup>. A recent meta-analysis found  
9 that the global prevalence of burnout of residents was 51%<sup>23</sup>. However, this study did not  
10 report the prevalence of burnout of neurosurgery residents. In this study, the burnout ratio  
11 of Chinese neurosurgeons was 44.51%, which was similar to the results of the U.S. but  
12 significantly higher than that of Europe. An interesting finding is that, although the  
13 academic neurosurgeons have heavier workloads and longer working hours than the non-  
14 academic neurosurgeons, they are more satisfied with their jobs, more committed to the  
15 work, and less likely to experience professional burnout. The reasons for the phenomena  
16 are complex, and yet we speculate several possible explanations, discussed as follows.

17  
18  
19  
20  
21  
22  
23  
24  
25  
26  
27  
28  
29 First of all, the income gap may play an important role. Our survey indicated that one of  
30 the most apparent differences between Chinese academic and non-academic  
31 neurosurgeons is that the former had a higher annual income (Table 1). It has been  
32 demonstrated in multiple industries that pay is one of the most important contributors for  
33 job satisfaction, work engagement, and, consequently, professional burnout<sup>13, 24-26</sup>.  
34 Currently, Chinese tertiary hospitals are attracting an increasing number of patients due  
35 to reputations and skillful physicians. Under the principle of performance appraisal which  
36 has been widely accepted by Chinese health care facilities, academic neurosurgeons have  
37 good reasons to be paid better than those working in regional hospitals. However, it does  
38 not imply that neurosurgeons are individuals with high-income. On the contrary, although  
39 neurosurgeons are paid approximately 100,000 to 110,000 RMB (14,400-15,800 USD)  
40 annually, which is 1.11-1.22 times more than the average salary of Chinese urban  
41 employees (89,993 RMB, 13,000 USD, data from the National Bureau of Statistics of  
42 China, <http://data.stats.gov.cn/easyquery.htm?cn=C01>), neurosurgeons are actually  
43 underpaid considering their prolonged training, long working hours (nearly 70 hours per  
44 week), and vast workload.

1  
2  
3  
4  
5 Second, academic neurosurgeons may have better career development. As employees of  
6 university hospitals and national medical centers, academic neurosurgeons have more  
7 opportunities to get funding support and build collaborations, which is crucial for  
8 research breakthroughs and development of personal career. According to the records of  
9 WFNS ([www.wfns.org](http://www.wfns.org)), AANS (American Association of Neurological Surgeons,  
10 [www.aans.org](http://www.aans.org)), and EANS (European Association of Neurosurgical Societies,  
11 [www.eans.org](http://www.eans.org)), the three major organizations each holding an international neurosurgical  
12 conference annually, the majority of Chinese speakers or poster authors of those meetings  
13 came from tertiary hospitals. In addition, the database from ClinicalTrials  
14 ([www.clinicaltrials.gov](http://www.clinicaltrials.gov)) and Chinese Clinical Trial Registry (ChiCTR,  
15 [www.chictr.org.cn](http://www.chictr.org.cn)) indicates that the majority of multi-center projects are led or  
16 exclusively recruit partners from tertiary hospitals. The advantages in career development,  
17 especially the chance of getting support at a national level and the opportunities of setting  
18 international collaborations with world-leading research facilities, may provide academic  
19 neurosurgeons a sense of superiority, and consequently, have positive impacts on job  
20 satisfaction and engagement <sup>27</sup>.  
21  
22  
23  
24  
25  
26  
27  
28  
29  
30  
31  
32  
33

34 Thirdly, tertiary hospitals provide a safer work environment. During the last two decades,  
35 the deterioration of the doctor-patient relationship has become a major issue in the  
36 Chinese medical system. Chinese doctors have been threatened by a surge of workplace  
37 violence. In 2017, the Chinese Medical Doctor Association (CMDA) released the latest  
38 version of “*White paper on medical practice in China*”, showing that 66% of Chinese  
39 physicians were involved in doctor-patient conflicts  
40 ([www.cmda.net/u/cms/www/201807/06181247ffex.pdf](http://www.cmda.net/u/cms/www/201807/06181247ffex.pdf)). The increase of doctor-patient  
41 conflicts has a significant impact on physician burnout, mental health, job satisfaction,  
42 and drop-out <sup>9, 28</sup>. In our survey, nearly 40% of neurosurgeons have encountered  
43 workplace violence in the last five years. Nevertheless, the incidence among academic  
44 neurosurgeons was significantly lower than that among non-academic neurosurgeons.  
45 One possible explanation is that university teaching hospitals and national medical  
46 centers provide better security service than regional hospitals do. In addition, the public  
47  
48  
49  
50  
51  
52  
53  
54  
55  
56  
57  
58  
59  
60

1  
2  
3 holds the view that surgeons in tertiary hospitals are more skilled and better equipped. It  
4 is believed that academic neurosurgeons represent the highest level in this country, hence  
5 more respect and fewer conflicts are expected.  
6  
7  
8  
9

10 The gap of pay, career development, and safety between academic and non-academic  
11 neurosurgeons have attracted an increasing number of young talents to work in tertiary  
12 hospitals. If the gap continues to exist or even widens further, an inevitable consequence  
13 is that patients would prefer to choose tertiary hospitals even if their disorders could be  
14 well treated in regional hospitals. This trend would lead to an imbalance in medical  
15 resources and affect the quality of medical care. In order to solve the problem, in 2016  
16 the Chinese authority initiated a new standardization training program requiring all  
17 Chinese neurosurgeons, particularly those working in regional hospitals, to finish an extra  
18 4 years of specialist training. The intention of this reform is to enable all Chinese  
19 neurosurgeons to receive standardized training and to narrow their gap in skills and  
20 knowledge. In the meanwhile, the research management agencies, such as the Nature  
21 Science Foundation of China and many local foundations, have also provided increasing  
22 support for projects from regional hospitals.  
23  
24  
25  
26  
27  
28  
29  
30  
31  
32  
33

34 This study has a few limitations. First of all, selection bias may exist during the process  
35 of the survey. There are approximately 11,000 registered neurosurgeons in China<sup>5</sup>. This  
36 is the largest group of neurosurgical specialists in the world. Although the number of  
37 1202 respondents was similar to the U.S. study and significantly larger than studies in  
38 other countries<sup>13, 22</sup>, the results of this study may only represent 16% of all Chinese  
39 neurosurgeons. Individuals who suffer from significant burnout or low morale were less  
40 likely to complete a voluntary survey. In other words, the survey may have provided  
41 more optimistic data. Moreover, the questionnaires were distributed electronically via  
42 smart-phone APPs and web pages, which may recruit more young respondents than for  
43 elder surgeons. Second, for easier understanding and analysis, we simply considered  
44 neurosurgeons working in tertiary hospitals as the academic and those in regional  
45 hospitals as the non-academic. However, researches in regional hospitals are actually not  
46 down to zero. The Chinese healthcare system requires every doctor to publish at least two  
47  
48  
49  
50  
51  
52  
53  
54  
55  
56

1  
2  
3 papers as one of the premise conditions for promotion, regardless of the type of hospital.  
4  
5 In major cities such as Beijing and Shanghai, the conditions for promotion are more  
6  
7 demanding, requesting publications in high standard international journals. Therefore,  
8  
9 neurosurgeons in regional hospitals also conduct clinical or basic researches, although  
10  
11 these researches are usually limited and under the help of tertiary hospitals. However,  
12  
13 under the aforementioned new policy, it is a fact that some non-academic neurosurgeons  
14  
15 were devoted to research and have made remarkable achievements. Although their  
16  
17 number is limited, these “non-academic” neurosurgeons could stay as potential  
18  
19 confounders in this anonymous survey. Finally, further studies are required to illustrate  
20  
21 the difference in job satisfaction and work engagement among neurosurgeons of different  
22  
23 titles. A comparison to other clinical specialists would also be interesting for future  
24  
25 investigations.

## 26 **Conclusion**

27  
28 This study reveals the working status of Chinese neurosurgeons. It also illustrates the  
29  
30 difference between academic and the non-academic neurosurgeons in China. Our data  
31  
32 suggests that Chinese neurosurgeons are under stress, particularly for those working in  
33  
34 regional hospitals. We hope this study will promote reforms for better support and a safer  
35  
36 working environment for Chinese neurosurgeons. We also hope this study may offer  
37  
38 valuable information for medical students and young talents who would choose  
39  
40 neurosurgery, a promising but challenging profession, as a career.

41  
42 Fortunately, the Chinese authority recently has increasingly emphasized the legitimate  
43  
44 rights and interests of medical workers. In addition, starting from 2018, it will be the  
45  
46 August 19th of each year as the Chinese Physician's Day. All in all, having healthy and  
47  
48 professionally satisfied physicians including neurosurgeons is the essential precondition  
49  
50 for improved health care. The change may take a long time, but the future is promising.

## 51 **Funding**

52  
53 This work was supported by Shanghai Municipal Science and Technology Commission  
54  
55 project (16411955300, 18441903300), Shanghai Municipal Commission of Health and  
56

1  
2  
3 Family Planning project (201840063, 201801075), The Major and Develop Project of  
4 Chinese Ministry of Science and Technology (2017ZX09304005), the Public Medical  
5 Artificial Intelligence Training Platform (XX-RGZN-01-17-4684), and Shanghai  
6 Minhang Nature Science Foundation project (2018MHZ007).  
7  
8  
9

### 10 11 12 **Competing interests**

13 None declared.  
14  
15

### 16 17 **Ethics approval**

18 The Ethics Review Committee of Huashan Hospital, Fudan University approved the  
19 study design and the collection of the data through the questionnaire.  
20  
21  
22

### 23 24 **Data sharing statement**

25 No additional data is available  
26  
27

### 28 29 **Contributors**

30 JY and YS drafted the manuscript and were involved in the interpretation of the data. JG  
31 and JC performed statistical analyses. JY, JC, and YS played a major role in  
32 questionnaire development. All the authors read and approved the final manuscript.  
33  
34  
35  
36

### 37 38 **Acknowledgments:**

39 We thank Dr. Fei Zou, Dr. Jian Yu, Dr. Jianping Song, and Dr. Jingjing Xia for  
40 supporting this study. We also thank Diane Bartram for proofreading and suggestions  
41 during the revision.  
42  
43  
44  
45  
46  
47

### 48 49 **Reference**

- 50 1. Wang C, Mao Y, Zhu JH, et al. The Department of Neurosurgery at Shanghai Huashan  
51 Hospital. *Neurosurgery*. 2008;62(4):947-52; discussion 52-3.
- 52 2. Chou SN. Perspectives in international neurosurgery: a glimpse of neurosurgery in China.  
53 *Neurosurgery*. 1978;3(1):120-2.  
54  
55

3. Ausman JI. The rise of Chinese neurosurgery and neurosurgery in the developing world, and scientific colonialism. *Surg Neurol.* 2007;67(3):323-5.
4. Zhao JZ, Zhou LF, Zhou DB, et al. The status quo of neurosurgery in China. *Neurosurgery.* 2008;62(2):516-20; discussion 20-1.
5. Societies WfN. Global Neurosurgical Workforce Map [cited 2018 September 27]. Available from: <https://www.wfns.org/menu/61/global-neurosurgical-workforce-map>.
6. Hauptman JS, Chow DS, Martin NA, et al. Research productivity in neurosurgery: trends in globalization, scientific focus, and funding. *J Neurosurg.* 2011;115(6):1262-72.
7. Wu D, Wang Y, Lam KF, et al. Health system reforms, violence against doctors and job satisfaction in the medical profession: a cross-sectional survey in Zhejiang Province, Eastern China. *BMJ Open.* 2014;4(12):e006431.
8. Tijdink JK, Vergouwen AC, Smulders YM. Emotional exhaustion and burnout among medical professors; a nationwide survey. *BMC medical education.* 2014;14:183.
9. Wang YX, Kaplar Z, L YT. AME survey-003 A1-part 2: the motivation factors of medical doctors in China. *Quantitative imaging in medicine and surgery.* 2015;5(6):917-24.
10. Rotenstein LS, Torre M, Ramos MA, et al. Prevalence of Burnout Among Physicians: A Systematic Review. *Jama.* 2018;320(11):1131-50.
11. Klimo P, Jr., DeCuypere M, Ragel BT, et al. Career satisfaction and burnout among U.S. neurosurgeons: a feasibility and pilot study. *World Neurosurg.* 2013;80(5):e59-68.
12. Shanafelt TD, Balch CM, Bechamps GJ, et al. Burnout and career satisfaction among American surgeons. *Annals of surgery.* 2009;250(3):463-71.
13. McAbee JH, Ragel BT, McCartney S, et al. Factors associated with career satisfaction and burnout among US neurosurgeons: results of a nationwide survey. *J Neurosurg.* 2015;123(1):161-73.
14. Hulin CL, Smith PC. A linear model of job satisfaction. *Journal of Applied Psychology.* 1965;49(3):209.
15. Smith PC, Kendall LM, Hulin CL. The measurement of satisfaction in work and retirement. . Chicago: Rand McNally; 1969.
16. Schaufeli WB, Salanova M, Gonzálezromá V, et al. The Measurement of Engagement and Burnout: A Two Sample Confirmatory Factor Analytic Approach. *Journal of Happiness Studies.* 2002;3(1):71-92.
17. Schaufeli WB, Bakker AB. Job demands, job resources, and their relationship with burnout and engagement: a multi-sample study. *Journal of Organizational Behavior.* 2004;25(3):293-315.
18. Fong TC, Ng SM. Measuring engagement at work: validation of the Chinese version of the Utrecht Work Engagement Scale. *Int J Behav Med.* 2012;19(3):391-7.
19. Zhang YQ, Xue C, Mao Y, et al. [Current status and development of Chinese neurosurgeons]. *Chinese Journal of Neurosurgery.* 2011;27(3):217-9.
20. Lee CD, del Carmen Montiel E. The correlation of mentoring and job satisfaction: a pilot study of mental health professionals. *Community mental health journal.* 2011;47(4):482-7.
21. Rahnavard F, Sadati AK, Hemmati S, et al. The impact of environmental and demographic factors on nursing job satisfaction. *Electronic physician.* 2018;10(4):6712-7.
22. Pranckeviciene A, Tamasauskas A, Deltuva VP, et al. Professional burnout and its correlates in Lithuanian neurosurgeons. *Acta Neurochir (Wien).* 2016;158(8):1437-45.

- 1  
2  
3 23. Low ZX, Yeo KA, Sharma VK, et al. Prevalence of Burnout in Medical and Surgical Residents:  
4 A Meta-Analysis. *International journal of environmental research and public health*.  
5 2019;16(9).  
6  
7 24. Judge TA, Piccolo RF, Podsakoff NP, et al. The relationship between pay and job satisfaction:  
8 A meta-analysis of the literature. *Journal of Vocational Behavior*. 2010;77(2):157-67.  
9  
10 25. Kulikowski K, Sedlak P. Can you buy work engagement? The relationship between pay, fringe  
11 benefits, financial bonuses and work engagement. *Current Psychology*. 2017:1-11.  
12  
13 26. Stringer C, Didham J, Theivananthampillai P. Motivation, pay satisfaction, and job satisfaction  
14 of front-line employees. *Qualitative Research in Accounting & Management*. 2011;8(2):161-79.  
15  
16 27. de Oliveira Vasconcelos Filho P, de Souza MR, Elias PE, et al. Physicians' job satisfaction and  
17 motivation in a public academic hospital. *Hum Resour Health*. 2016;14(1):75.  
18  
19 28. Wang Y, Fang M, Wang Y. How to decrease violence against doctors in China? *Int J Cardiol*.  
20 2016;211:66.  
21  
22  
23  
24  
25  
26  
27  
28  
29  
30  
31  
32  
33  
34  
35  
36  
37  
38  
39  
40  
41  
42  
43  
44  
45  
46  
47  
48  
49  
50  
51  
52  
53  
54  
55  
56  
57  
58  
59  
60



**Table 1. Demographic & practice characteristics of respondents**

|                                                                       | All Neurosurgeons<br>(n=1202) |       | Academic (n=823) |       | Non-academic<br>(n=379) |       | p-value* |
|-----------------------------------------------------------------------|-------------------------------|-------|------------------|-------|-------------------------|-------|----------|
|                                                                       | n                             | %     | n                | %     | n                       | %     |          |
| Gender                                                                |                               |       |                  |       |                         |       |          |
| Male                                                                  | 1117                          | 92.93 | 757              | 91.98 | 360                     | 94.99 | 0.069    |
| Female                                                                | 85                            | 7.07  | 66               | 8.02  | 19                      | 5.01  | 0.069    |
| Age                                                                   |                               |       |                  |       |                         |       |          |
| ≤35                                                                   | 586                           | 48.75 | 406              | 49.33 | 180                     | 47.49 | 0.58     |
| 36-45                                                                 | 439                           | 36.52 | 307              | 37.30 | 132                     | 34.83 | 0.41     |
| 46-55                                                                 | 158                           | 13.14 | 99               | 12.03 | 59                      | 15.57 | 0.092    |
| ≥56                                                                   | 19                            | 1.58  | 11               | 1.34  | 8                       | 2.11  | 0.47     |
| Marital status                                                        |                               |       |                  |       |                         |       |          |
| Married                                                               | 956                           | 79.53 | 630              | 76.55 | 326                     | 86.02 | <0.01    |
| Unmarried                                                             | 196                           | 16.31 | 164              | 19.93 | 32                      | 8.44  | <0.01    |
| Divorced                                                              | 50                            | 4.16  | 29               | 3.52  | 21                      | 5.54  | 0.11     |
| Number of kids<br>( married only)                                     |                               |       |                  |       |                         |       |          |
| 0                                                                     | 80                            | 8.37  | 74               | 11.75 | 6                       | 1.84  | <0.01    |
| 1                                                                     | 589                           | 61.61 | 392              | 62.22 | 197                     | 60.43 | 0.59     |
| ≥2                                                                    | 287                           | 30.02 | 164              | 26.03 | 123                     | 37.73 | <0.01    |
| Nature of current<br>employer                                         |                               |       |                  |       |                         |       |          |
| Public                                                                | 1105                          | 91.93 | 794              | 96.48 | 311                     | 82.06 | <0.01    |
| Private                                                               | 97                            | 8.07  | 29               | 3.52  | 68                      | 17.94 | <0.01    |
| Professional status                                                   |                               |       |                  |       |                         |       |          |
| Intern                                                                | 36                            | 3.00  | 25               | 3.04  | 11                      | 2.90  | 0.99     |
| Resident                                                              | 336                           | 27.95 | 241              | 29.28 | 95                      | 25.07 | 0.13     |
| Attending doctor                                                      | 509                           | 42.35 | 342              | 41.56 | 167                     | 44.06 | 0.41     |
| Senior/Chief                                                          | 321                           | 26.71 | 215              | 26.12 | 106                     | 27.97 | 0.50     |
| Working hours per<br>week (hours, mean ±sd)                           |                               |       |                  |       |                         |       |          |
| Total                                                                 | 63.91±11.04                   | /     | 64.39±9.63       | /     | 61.92±8.34              | /     | <0.01    |
| Clinic                                                                | 58.19±10.34                   | /     | 56.17±9.12       | /     | 61.42±7.92              | /     | <0.01    |
| Research                                                              | 5.72±3.67                     | /     | 8.21±4.64        | /     | 0.53±0.36               | /     | <0.01    |
| Annual income<br>(10,000RMB)                                          |                               |       |                  |       |                         |       |          |
| <6                                                                    | 202                           | 16.81 | 121              | 14.70 | 81                      | 21.37 | <0.01    |
| 6-10                                                                  | 384                           | 31.95 | 231              | 28.07 | 153                     | 40.37 | <0.01    |
| 11-15                                                                 | 366                           | 30.45 | 264              | 32.08 | 102                     | 26.91 | 0.071    |
| 16-20                                                                 | 172                           | 14.31 | 140              | 17.01 | 32                      | 8.44  | <0.01    |
| ≥20                                                                   | 78                            | 6.49  | 67               | 8.14  | 11                      | 2.90  | <0.01    |
| Experience or witness<br>of workplace violence<br>in the last 5 years |                               |       |                  |       |                         |       |          |
| Yes                                                                   | 456                           | 37.94 | 289              | 35.12 | 167                     | 44.06 | <0.01    |
| Encouraging child to<br>become a doctor                               |                               |       |                  |       |                         |       |          |
| Yes                                                                   | 80                            | 6.66  | 55               | 6.68  | 25                      | 6.60  | 0.99     |
| No                                                                    | 876                           | 72.88 | 573              | 69.62 | 303                     | 79.95 | <0.01    |
| Not sure                                                              | 246                           | 20.47 | 195              | 23.69 | 51                      | 13.46 | <0.01    |

\* The p-values indicate the difference between the academic and non-academic neurosurgeons. A p-value less than 0.05 is considered as statistical significance.

**Table 2. Burnout measured by MBI-HSS**

| Burnout Subscales       | All Neurosurgeons<br>(n=1202) |       | Academic<br>(n=823) |       | Non-academic<br>(n=379) |       | p-value* |
|-------------------------|-------------------------------|-------|---------------------|-------|-------------------------|-------|----------|
|                         | n                             | %     | n                   | %     | n                       | %     |          |
| Emotional Exhaustion    |                               |       |                     |       |                         |       |          |
| Low                     | 195                           | 16.22 | 136                 | 16.52 | 59                      | 15.57 | 0.68     |
| Intermediate            | 573                           | 47.67 | 414                 | 50.30 | 159                     | 41.95 | <0.01    |
| High                    | 434                           | 36.11 | 273                 | 33.17 | 161                     | 42.48 | <0.01    |
| Depersonalization       |                               |       |                     |       |                         |       |          |
| Low                     | 543                           | 45.17 | 394                 | 47.87 | 149                     | 39.31 | <0.01    |
| Intermediate            | 303                           | 25.21 | 253                 | 30.74 | 50                      | 13.19 | <0.01    |
| High                    | 356                           | 29.62 | 176                 | 21.39 | 180                     | 47.49 | <0.01    |
| Personal Accomplishment |                               |       |                     |       |                         |       |          |
| Low                     | 533                           | 44.34 | 363                 | 44.11 | 170                     | 44.85 | 0.81     |
| Intermediate            | 518                           | 43.09 | 376                 | 45.69 | 142                     | 37.47 | <0.01    |
| High                    | 151                           | 12.56 | 84                  | 10.21 | 67                      | 17.68 | <0.01    |
| Burnout                 | 535                           | 44.51 | 312                 | 37.91 | 223                     | 58.84 | <0.01    |

\* The p-values indicate the difference between the academic and non-academic neurosurgeons. A p-value less than 0.05 is considered as statistical significance.

**Table 3. Burnout measured by MBI-HSS among neurosurgeons with different job titles**

|                  | All neurosurgeons |                           | Academic |                          | Non-academic |                          | p-value*        |
|------------------|-------------------|---------------------------|----------|--------------------------|--------------|--------------------------|-----------------|
|                  | n                 | Burnout, n(%)             | n        | Burnout, n(%)            | n            | Burnout, n(%)            |                 |
| Intern/Resident  | 372               | 162(43.54)                | 266      | 108(40.60)               | 106          | 63(59.43)                | <b>&lt;0.01</b> |
| Attending doctor | 509               | 253(49.71)                | 342      | 145(42.40)               | 167          | 115(68.86)               | <b>&lt;0.01</b> |
| Senior/Chief     | 321               | 120(37.38) <sup># †</sup> | 215      | 59(27.44) <sup># †</sup> | 106          | 45(42.45) <sup># †</sup> | <b>&lt;0.01</b> |

\* The p-values indicate the difference between the academic and non-academic neurosurgeons. A p-value less than 0.05 is considered as statistical significance.

# There were statistic differences in the burnout rates between the group of Intern/Resident and the Senior/Chief neurosurgeons

† There were statistic differences in the burnout rate between the group of Attending doctor and the Senior/Chief neurosurgeons

For peer review only

**Table 4. Job satisfaction measured by JDI**

| JDI Subscales | All Neurosurgeons<br>(n=1202) |       | Academic<br>(n=823) |       | Non-academic<br>(n=379) |       | p-value*        |
|---------------|-------------------------------|-------|---------------------|-------|-------------------------|-------|-----------------|
|               | Mean                          | Sd    | Mean                | Sd    | Mean                    | Sd    |                 |
| JDI Score     | 102.60                        | 36.63 | 107.04              | 36.48 | 92.95                   | 35.12 | <b>&lt;0.01</b> |
| Work Itself   | 24.27                         | 11.76 | 24.55               | 11.93 | 22.30                   | 12.49 | <b>&lt;0.01</b> |
| Pay           | 7.44                          | 4.22  | 7.60                | 4.09  | 7.11                    | 4.84  | 0.059           |
| Promotion     | 6.73                          | 4.55  | 7.09                | 4.29  | 5.92                    | 4.99  | <b>&lt;0.01</b> |
| Supervision   | 25.44                         | 13.35 | 27.14               | 13.83 | 21.76                   | 11.41 | <b>&lt;0.01</b> |
| Coworker      | 24.53                         | 10.60 | 25.32               | 10.76 | 24.83                   | 10.07 | 0.45            |

\* The p-values indicate the difference between the academic and non-academic neurosurgeons. A p-value less than 0.05 is considered as statistical significance.

**Table 5. Job engagement measured by UWES**

| UWES Subscales | All Neurosurgeons<br>(n=1202) |       | Academic<br>(n=823) |       | Non-academic<br>(n=379) |       | p-value*        |
|----------------|-------------------------------|-------|---------------------|-------|-------------------------|-------|-----------------|
|                | Mean                          | Sd    | Mean                | Sd    | Mean                    | Sd    |                 |
| UWES Score     | 61.27                         | 26.21 | 62.52               | 25.53 | 58.55                   | 27.49 | <b>0.015</b>    |
| Vigor          | 22.04                         | 9.48  | 22.39               | 9.37  | 21.28                   | 9.69  | 0.059           |
| Dedication     | 18.03                         | 8.83  | 18.57               | 8.48  | 16.86                   | 9.46  | <b>&lt;0.01</b> |
| Absorption     | 21.20                         | 9.75  | 21.57               | 9.55  | 20.41                   | 10.13 | 0.057           |

\* The p-values indicate the difference between the academic and non-academic neurosurgeons. A p value less than 0.05 is considered as statistical significance.

For peer review only

**Table 6. Multivariate analysis on burnout**

|                                                                 | All Neurosurgeons (n=1202) |            |                 | Academic(n=823) |            |                 | Non-academic(n=379) |            |                 |
|-----------------------------------------------------------------|----------------------------|------------|-----------------|-----------------|------------|-----------------|---------------------|------------|-----------------|
|                                                                 | OR                         | 95% CI     | p-value         | OR              | 95% CI     | p-value         | OR                  | 95% CI     | p value         |
| Gender                                                          |                            |            |                 |                 |            |                 |                     |            |                 |
| Male                                                            | 1.43                       | 0.91-2.26  | 0.14            | 1.44            | 0.84-2.49  | 0.23            | 1.04                | 0.41-2.65  | 0.99            |
| Age                                                             |                            |            |                 |                 |            |                 |                     |            |                 |
| ≤35                                                             | 1.07                       | 0.85-1.35  | 0.55            | 1.11            | 0.84-1.47  | 0.46            | 1.045               | 0.69-1.58  | 0.82            |
| 36-45                                                           | 1.20                       | 0.95-1.52  | 0.13            | 1.06            | 0.79-1.12  | 0.70            | 1.75                | 1.12-2.71  | <b>0.013</b>    |
| ≥46                                                             | 0.61                       | 0.43-0.85  | <b>&lt;0.01</b> | 0.70            | 0.45-1.08  | 0.10            | 0.39                | 0.23-0.69  | <b>&lt;0.01</b> |
| Marital status                                                  |                            |            |                 |                 |            |                 |                     |            |                 |
| Married                                                         | 0.71                       | 0.54-0.94  | <b>0.018</b>    | 0.54            | 0.39-0.75  | <b>&lt;0.01</b> | 1.02                | 0.56-1.83  | 0.99            |
| Unmarried                                                       | 0.92                       | 0.68-1.26  | 0.61            | 1.45            | 1.03-20.6  | <b>0.033</b>    | 0.29                | 0.13-0.62  | <b>&lt;0.01</b> |
| Divorced                                                        | 7.02                       | 2.37-15.08 | <b>&lt;0.01</b> | 4.53            | 1.98-10.37 | <b>&lt;0.01</b> | 7.52                | 1.84-28.43 | <b>&lt;0.01</b> |
| Number of kids (married only)                                   |                            |            |                 |                 |            |                 |                     |            |                 |
| 0                                                               | 0.48                       | 0.29-0.80  | <b>&lt;0.01</b> | 0.78            | 0.46-1.33  | 0.43            | 0.17                | 0.075-0.38 | <b>&lt;0.01</b> |
| 1                                                               | 1.47                       | 1.12-1.92  | <b>&lt;0.01</b> | 1.16            | 0.83-1.63  | 0.39            | 2.46                | 1.56-3.98  | <b>&lt;0.01</b> |
| ≥2                                                              | 0.83                       | 0.63-1.11  | 0.21            | 0.95            | 0.65-1.38  | 0.20            | 0.49                | 0.31-0.77  | <b>&lt;0.01</b> |
| Nature of current employer                                      |                            |            |                 |                 |            |                 |                     |            |                 |
| Public hospital                                                 | 1.39                       | 0.91-2.14  | 0.13            | 0.36            | 0.16-0.77  | <b>0.010</b>    | 5.37                | 2.99-9.67  | <b>&lt;0.01</b> |
| Job titles                                                      |                            |            |                 |                 |            |                 |                     |            |                 |
| Intern/resident                                                 | 0.88                       | 0.69-1.12  | 0.29            | 0.99            | 0.74-1.33  | 0.99            | 0.82                | 0.52-1.28  | 0.41            |
| Attending doctor                                                | 1.40                       | 1.12-1.76  | <b>&lt;0.01</b> | 1.05            | 0.79-1.40  | 0.73            | 2.57                | 1.67-3.96  | <b>&lt;0.01</b> |
| Senior/Chief                                                    | 0.74                       | 0.57-0.97  | <b>0.031</b>    | 0.94            | 0.67-1.32  | 0.71            | 0.41                | 0.25-0.64  | <b>&lt;0.01</b> |
| Working hours per week                                          |                            |            |                 |                 |            |                 |                     |            |                 |
| ≤55                                                             | 0.49                       | 0.38-0.63  | <b>&lt;0.01</b> | 0.59            | 0.33-0.61  | <b>&lt;0.01</b> | 0.68                | 0.43-1.08  | 0.10            |
| 56-70                                                           | 0.63                       | 0.49-0.81  | <b>&lt;0.01</b> | 0.47            | 0.34-0.65  | <b>&lt;0.01</b> | 0.99                | 0.64-1.55  | 0.99            |
| ≥71                                                             | 3.12                       | 2.43-3.99  | <b>&lt;0.01</b> | 4.56            | 3.33-6.22  | <b>&lt;0.01</b> | 1.39                | 0.91-2.12  | 0.13            |
| Annual income (10,000RMB)                                       |                            |            |                 |                 |            |                 |                     |            |                 |
| <10                                                             | 1.85                       | 1.47-2.32  | <b>&lt;0.01</b> | 1.82            | 1.37-2.43  | <b>&lt;0.01</b> | 1.33                | 0.88-2.03  | 0.17            |
| 11-15                                                           | 0.76                       | 0.59-0.98  | <b>0.033</b>    | 0.63            | 0.46-0.86  | <b>&lt;0.01</b> | 1.32                | 0.82-2.11  | 0.24            |
| ≥16                                                             | 0.55                       | 0.41-0.74  | <b>&lt;0.01</b> | 0.77            | 0.55-1.07  | 0.12            | 0.29                | 0.15-0.58  | <b>&lt;0.01</b> |
| Experience or witness of workplace violence in the last 5 years |                            |            |                 |                 |            |                 |                     |            |                 |
| Yes                                                             | 1.52                       | 1.18-2.24  | <b>&lt;0.01</b> | 1.42            | 1.15-2.07  | <b>0.011</b>    | 2.03                | 1.50-3.25  | <b>&lt;0.01</b> |

\* A p-value less than 0.05 is considered as statistical significance.

**STROBE Statement**

## Checklist of items that should be included in reports of observational studies

| Section/Topic             | Item No | Recommendation                                                                                                                                                                             | Reported on Page No |
|---------------------------|---------|--------------------------------------------------------------------------------------------------------------------------------------------------------------------------------------------|---------------------|
| <b>Title and abstract</b> | 1       | (a) Indicate the study's design with a commonly used term in the title or the abstract                                                                                                     | 1                   |
|                           |         | (b) Provide in the abstract an informative and balanced summary of what was done and what was found                                                                                        | 1                   |
| <b>Introduction</b>       |         |                                                                                                                                                                                            |                     |
| Background/rationale      | 2       | Explain the scientific background and rationale for the investigation being reported                                                                                                       | 3-5                 |
| Objectives                | 3       | State specific objectives, including any prespecified hypotheses                                                                                                                           | 5                   |
| <b>Methods</b>            |         |                                                                                                                                                                                            |                     |
| Study design              | 4       | Present key elements of study design early in the paper                                                                                                                                    | 5                   |
| Setting                   | 5       | Describe the setting, locations, and relevant dates, including periods of recruitment, exposure, follow-up, and data collection                                                            | 5-7                 |
| Participants              | 6       | (a) <i>Cohort study</i> —Give the eligibility criteria, and the sources and methods of selection of participants. Describe methods of follow-up                                            | 5                   |
|                           |         | <i>Case-control study</i> —Give the eligibility criteria, and the sources and methods of case ascertainment and control selection. Give the rationale for the choice of cases and controls |                     |
|                           |         | <i>Cross-sectional study</i> —Give the eligibility criteria, and the sources and methods of selection of participants                                                                      |                     |
| Variables                 | 7       | (b) <i>Cohort study</i> —For matched studies, give matching criteria and number of exposed and unexposed                                                                                   | N/A                 |
|                           |         | <i>Case-control study</i> —For matched studies, give matching criteria and the number of controls per case                                                                                 |                     |
|                           |         | Clearly define all outcomes, exposures, predictors, potential confounders, and effect modifiers. Give diagnostic criteria, if applicable                                                   | 5-7                 |
| Data sources/measurement  | 8*      | For each variable of interest, give sources of data and details of methods of assessment (measurement). Describe comparability of assessment methods if there is more than one group       | 5-7                 |
| Bias                      | 9       | Describe any efforts to address potential sources of bias                                                                                                                                  | 5                   |
| Study size                | 10      | Explain how the study size was arrived at                                                                                                                                                  | 5                   |
| Quantitative variables    | 11      | Explain how quantitative variables were handled in the analyses. If applicable, describe which groupings were chosen and why                                                               | 7                   |
| Statistical methods       | 12      | (a) Describe all statistical methods, including those used to control for confounding                                                                                                      | 7                   |
|                           |         | (b) Describe any methods used to examine subgroups and interactions                                                                                                                        | 7                   |
|                           |         | (c) Explain how missing data were addressed                                                                                                                                                | N/A                 |
|                           |         | (d) <i>Cohort study</i> —If applicable, explain how loss to follow-up was addressed                                                                                                        | N/A                 |
|                           |         | <i>Case-control study</i> —If applicable, explain how matching of cases and controls was addressed                                                                                         |                     |
|                           |         | <i>Cross-sectional study</i> —If applicable, describe analytical methods taking account of sampling strategy                                                                               |                     |
|                           |         | (e) Describe any sensitivity analyses                                                                                                                                                      | 7                   |

| Section/Topic            | Item No | Recommendation                                                                                                                                                                                               | Reported on Page No |
|--------------------------|---------|--------------------------------------------------------------------------------------------------------------------------------------------------------------------------------------------------------------|---------------------|
| <b>Results</b>           |         |                                                                                                                                                                                                              |                     |
| Participants             | 13*     | (a) Report numbers of individuals at each stage of study—eg numbers potentially eligible, examined for eligibility, confirmed eligible, included in the study, completing follow-up, and analysed            | 5                   |
|                          |         | (b) Give reasons for non-participation at each stage                                                                                                                                                         | N/A                 |
|                          |         | (c) Consider use of a flow diagram                                                                                                                                                                           | N/A                 |
| Descriptive data         | 14*     | (a) Give characteristics of study participants (eg demographic, clinical, social) and information on exposures and potential confounders                                                                     | 7-8                 |
|                          |         | (b) Indicate number of participants with missing data for each variable of interest                                                                                                                          | N/A                 |
|                          |         | (c) <i>Cohort study</i> —Summarise follow-up time (eg, average and total amount)                                                                                                                             | N/A                 |
| Outcome data             | 15*     | <i>Cohort study</i> —Report numbers of outcome events or summary measures over time                                                                                                                          | N/A                 |
|                          |         | <i>Case-control study</i> —Report numbers in each exposure category, or summary measures of exposure                                                                                                         | N/A                 |
|                          |         | <i>Cross-sectional study</i> —Report numbers of outcome events or summary measures                                                                                                                           | 8-10                |
| Main results             | 16      | (a) Give unadjusted estimates and, if applicable, confounder-adjusted estimates and their precision (eg, 95% confidence interval). Make clear which confounders were adjusted for and why they were included | 8-10                |
|                          |         | (b) Report category boundaries when continuous variables were categorized                                                                                                                                    | 8-10                |
|                          |         | (c) If relevant, consider translating estimates of relative risk into absolute risk for a meaningful time period                                                                                             | N/A                 |
| Other analyses           | 17      | Report other analyses done—eg analyses of subgroups and interactions, and sensitivity analyses                                                                                                               | 8-9                 |
| <b>Discussion</b>        |         |                                                                                                                                                                                                              |                     |
| Key results              | 18      | Summarise key results with reference to study objectives                                                                                                                                                     | 10-11               |
| Limitations              | 19      | Discuss limitations of the study, taking into account sources of potential bias or imprecision. Discuss both direction and magnitude of any potential bias                                                   | 13-14               |
| Interpretation           | 20      | Give a cautious overall interpretation of results considering objectives, limitations, multiplicity of analyses, results from similar studies, and other relevant evidence                                   | 11-13               |
| Generalisability         | 21      | Discuss the generalisability (external validity) of the study results                                                                                                                                        | 13-14               |
| <b>Other Information</b> |         |                                                                                                                                                                                                              |                     |
| Funding                  | 22      | Give the source of funding and the role of the funders for the present study and, if applicable, for the original study on which the present article is based                                                | 14                  |

\*Give information separately for cases and controls in case-control studies and, if applicable, for exposed and unexposed groups in cohort and cross-sectional studies.

**Note:** An Explanation and Elaboration article discusses each checklist item and gives methodological background and published examples of transparent reporting. The STROBE checklist is best used in conjunction with this article (freely available on the Web sites of PLoS Medicine at <http://www.plosmedicine.org/>, Annals of Internal Medicine at <http://www.annals.org/>, and Epidemiology at <http://www.epidem.com/>). Information on the STROBE Initiative is available at [www.strobe-statement.org](http://www.strobe-statement.org).



# BMJ Open

## Academic vs. non-academic neurosurgeons in China: a national cross-sectional study on workload, burnout, and engagement

|                                 |                                                                                                                                                                                                                                                                                                                                                                                              |
|---------------------------------|----------------------------------------------------------------------------------------------------------------------------------------------------------------------------------------------------------------------------------------------------------------------------------------------------------------------------------------------------------------------------------------------|
| Journal:                        | <i>BMJ Open</i>                                                                                                                                                                                                                                                                                                                                                                              |
| Manuscript ID                   | bmjopen-2018-028309.R2                                                                                                                                                                                                                                                                                                                                                                       |
| Article Type:                   | Original research                                                                                                                                                                                                                                                                                                                                                                            |
| Date Submitted by the Author:   | 18-Aug-2019                                                                                                                                                                                                                                                                                                                                                                                  |
| Complete List of Authors:       | Yu, Jinli; Huashan Hospital, Fudan University, Department of International Education and cooperation<br>Gao, Jiming; Huashan Hospital Fudan University, Department of Medical Education<br>Chen, Junyan; East China Institute of Telecommunications, The Artificial Intelligence and Big Data Business Division<br>Sun, Yirui; Huashan Hospital Fudan University, Department of Neurosurgery |
| <b>Primary Subject Heading</b>: | Health services research                                                                                                                                                                                                                                                                                                                                                                     |
| Secondary Subject Heading:      | Health policy, Medical education and training, Medical management                                                                                                                                                                                                                                                                                                                            |
| Keywords:                       | Neurosurgeon, China, academic, burnout, job satisfaction, engagement                                                                                                                                                                                                                                                                                                                         |
|                                 |                                                                                                                                                                                                                                                                                                                                                                                              |

SCHOLARONE™  
Manuscripts

# Academic vs. non-academic neurosurgeons in China: a national cross-sectional study on workload, burnout, and engagement

Jinli Yu MA.<sup>1,2</sup>, Jiming Gao MPA.<sup>3</sup>, Junyan Chen Ph.D<sup>4</sup>, Yirui Sun MD. Ph.D<sup>5</sup>

1. Department of International Education and cooperation, Huashan Hospital, Fudan University
2. Continuing Medical Education, Harvard Medical School
3. Department of Medical Education, Huashan Hospital, Fudan University
4. The Artificial Intelligence and Big Data Business Division, East China Institute of Telecommunications
5. Department of Neurosurgery, Huashan Hospital, Fudan University.

## Corresponding author:

Yirui Sun MD. Ph.D

Email: yirui.sun@live.cn

Department of Neurosurgery, Huashan Hospital, Fudan University

12 Urumqi Middle Road, Shanghai, China, 200040

## Keywords:

Neurosurgeon; China; academic; burnout; job satisfaction; engagement.

**Running Title:** Academic vs. Non-academic neurosurgeons in China

## Abstract

**Objectives:** Chinese neurosurgery has made great progress during the past decades, yet little is known about the working status of neurosurgeons. This study aimed to evaluate the difference between academic and non-academic neurosurgeons, focusing on their professional burnout, job satisfaction, and work engagement.

**Design:** Cross-sectional nationwide survey.

**Study setting:** The survey was conducted in China between 2017 and 2018.

**Participants:** A total number of 823 academic neurosurgeons and 379 non-academic neurosurgeons participated in this study.

**Outcome measures:** Professional burnout, job satisfaction, and work engagement were assessed using the Maslach Burnout Inventory, the Job Descriptive Index and the Utrecht Work Engagement Scale, respectively.

**Results:** The majority of respondents were male (92.93%), less than 45 years old (85.27%), and married (79.53%). Chinese neurosurgeons worked  $63.91 \pm 11.04$  hours per week, and approximately 45% experienced burnout. Compared with non-academic respondents, academic neurosurgeons had longer working hours ( $p < 0.01$ ), higher income ( $p < 0.01$ ), and were less willing to get married ( $p < 0.01$ ). In addition, they showed a lower degree of burnout ( $p < 0.01$ ), a higher level of job satisfaction ( $p < 0.01$ ) and were more enthusiastic at work ( $p = 0.015$ ). Multivariate regression analyses indicated that divorced (OR 7.02, 95% CI 2.37-15.08) and workplace violence (OR 1.52, 95% CI 1.18-2.24) were associated with burnout for both academic and non-academic respondents. Long working hours ( $\geq 71$  hours per week) and low annual income ( $< 100,000$  RMB) were risk factors for burnout among academic neurosurgeons. For non-academic neurosurgical surgeons (age 36-45), working as attending doctors, serving in public hospitals, and having the first house-living child were all closely related to the incidence of burnout.

**Conclusions:** Chinese neurosurgeons are under significant stress particularly for the non-academic neurosurgeons. Offering better opportunities for training, promotion, higher income, and safer working environments could be solutions to relieve burnout and improve career satisfaction and engagement.

**Registration:** Chinese Clinical Trial Registry (ChiCTR1800014762).

### Strengths and limitations of this study:

This is the first national cross-sectional survey to assess the working status of Chinese neurosurgeons.

Worldwide common questionnaires including MBI-HSS, JDI, and UEWS were applied in the survey. The results would facilitate a comparison to previous and future studies.

Subgroup analyses were performed to illustrate burnout levels among junior and senior neurosurgeons.

Despite a large number (1202) of respondents, the study covered approximately 16% of Chinese neurosurgeons. Selection bias may exist.

A comparison to other clinical specialists would also be interesting for future investigations.

### Introduction

Chinese neurosurgery has a relatively short history. The first formal record of neurosurgical procedure could be traced back to 1950, when the first craniotomy operation was performed by Dr. Kefei Shan and Yuquan Shi in Shanghai<sup>1</sup>. At that time, Chinese neurosurgical facilities started with only a few pioneer surgeons and limited beds<sup>1, 2</sup>. A remarkable milestone in the development of Chinese neurosurgery was the foundation of the Chinese Neurosurgical Society (CNS) in 1986<sup>3, 4</sup>. To date, modern neurosurgical clinic centers have been established in many major cities, with some performing over 8,000 sophisticated operations annually<sup>1, 4</sup>. According to the World Federation of Neurosurgical Societies (WFNS) and the Chinese Neurosurgeon Society (CNS)<sup>5</sup>, China has approximately 11,000 registered neurosurgeons, which is the largest group of neurosurgeons in the world. In addition, Chinese neurosurgery has made remarkable progress in academic research. It is indicated that China has contributed approximately 4.2% of published neurosurgical research in the world (ranked fifth in the world behind U.S, Japan, Germany, and U.K), and emerged as the only country among the top 5 with substantial growth of neurosurgical research productivity (121.9% ± 9.98% per year)<sup>6</sup>.

Despite the remarkable achievement, to our knowledge, there have been few published studies revealing the working status of Chinese neurosurgeons. The training program and

1  
2  
3 career path of a neurosurgeon in China are different from that in the Western world. In  
4 China, the healthcare system involves hospitals of three levels. General practitioners  
5 usually work in level I hospitals, also known as community health centers. Level I  
6 hospitals provide primary health care and are not equipped with neurosurgical facilities.  
7  
8 The Level II hospitals, also known as regional medical centers, recruit specialists  
9 including neurosurgeons. Routine neurosurgical operations can be performed in these  
10 hospitals. The level III (tertiary) hospitals are usually university teaching hospitals and  
11 national medical centers. Neurosurgeons working in tertiary hospitals are required to not  
12 only take care of complex cases (usually transferred from regional hospitals), but also  
13 conduct clinical/basic research, teaching, and tutoring. Therefore, the neurosurgical  
14 surgeons working in tertiary hospitals are usually considered academic neurosurgeons  
15 and those working in regional hospitals as the non-academic. For young doctors who are  
16 interested in neurosurgery, after graduation from medical school, they are recruited to  
17 work either in a regional or tertiary hospital and start their training as neurosurgeon  
18 residents. The updated (since 2003) training program requires a neurosurgeon resident to  
19 complete two stages (5-7 years in total) standardized training before they can apply for  
20 senior positions such as attending and then consulting neurosurgeons. Although young  
21 trainees may apply to work for a different hospital (e.g from a non-academic to academic  
22 center), the number of successful applicants is very limited. A brief introduction of the  
23 Chinese neurosurgery system and training system can be found elsewhere <sup>4</sup>.

24  
25  
26  
27  
28  
29  
30  
31  
32  
33  
34  
35  
36  
37  
38  
39 Due to the inherent difference of the academic and non-academic medical specialists in  
40 China, a natural belief holds that the academic neurosurgeons are under significant stress  
41 as a result of additional responsibilities. However, during our previous study to assess the  
42 working status of Chinese physicians from various specialties, subgroup analyses  
43 suggested that surgeons working in regional hospitals were actually more stressed  
44 (submitted and under review). Nevertheless, in-depth investigations could not be  
45 performed due to limited case numbers. Here we reported the results on a national survey  
46 on Chinese neurosurgeons. The focus of this study is to reveal the working status, as well  
47 as the difference between academic and non-academic of neurosurgeons. Detailed  
48 methods and results are described below.

## Materials and Methods

### *Study Design and Questionnaires*

From June 2017 to September 2018, a national online survey was conducted in mainland China using both smartphone apps and website visiting under the support of the East Institution of China Academy of Information and Communications Technology. This study was part of a two-phase national survey on the working and living status of Chinese physicians, which was approved and registered with the Chinese Clinical Trial Registry (ChiCTR1800014762). The Phase I investigation was conducted between June 2017 and February 2018, recruiting 1167 physicians of various specialties. This part focused on the comparison between specialties (submitted elsewhere and under review). The phase II investigation was conducted between March and September 2018, in which the working and living status of each specialty is further investigated. Answers from resident/attending/senior neurosurgeons in both phase I and II investigations were analyzed in this study. Potential respondents were invited to complete the online questionnaires via mailing lists of the Shanghai Medical Doctor Association, the national continuing education platform “Neurosurgery News”, and the professional networks of the authors. Neurosurgeons were also invited during national or local conferences via two-dimensional barcodes scanning. An introduction of the research purpose and methods was provided at the beginning of the online survey. Informed consent was received electronically from each respondent. All answers were collected anonymously. To avoid repeated participation, each IP address was restricted to fill out the questionnaire once.

The questionnaire consisted of 147 closed-end questions, organized in sections including demographic and practice characteristics, professional burnout, job satisfaction, and work engagement. Most questions were derived from the well-established and standard scales (see below). A few questions were derived from previous studies<sup>7-9</sup> or were developed by the authors. Details for each section are described as follows.

### *Demographic and practice characteristics*

1  
2  
3 Respondents were asked to provide gender, marital and family status, job titles,  
4 nature of employers, weekly working hours, annual income, experience of workplace  
5 violence, and whether a respondent would encourage his/her kid(s) to become a doctor.  
6  
7 Neurosurgical respondents working in tertiary hospitals were considered academic  
8 neurosurgeons, and those from regional hospitals were considered as non-academic  
9 neurosurgeons.  
10  
11  
12  
13  
14

### 15 *Burnout*

16 Professional burnout was measured by the 22-item Maslach Burnout Inventory-Human  
17 Services Survey (MBI-HSS). In previous studies on professional burnout, heterogeneities  
18 have been recognized regarding the different tools and questionnaire versions. However,  
19 the original 22-item version of MBI-HSS is still one of the most commonly used tools to  
20 measure burnout<sup>10</sup>. The 22 items covering three dimensions: Emotional Exhaustion (EE, 9  
21 items), Depersonalization (DP, 5 items), and Personal Accomplishments (PA, 8 items).  
22 Answers to each question were designed according to the frequency of a respondent's  
23 encountering situations on a 7-point scale, from "never" (0 points) to "daily" (6 points).  
24 MBI scores of each dimension were further graded as high, intermediate, or low (low  
25 EE≤18; high EE≥27; low DP≤5, high DP≥10; low PA≤33; high PA≥40)<sup>11</sup>. A respondent  
26 would be considered burnt out if he/she had high scores in the Emotional Exhaustion or  
27 Depersonalization assessment<sup>11-13</sup>. The internal consistency of the questionnaire was  
28 presented as Cronbach's  $\alpha$  values for each section (0.91, 0.90, and 0.85, respectively).  
29  
30  
31  
32  
33  
34  
35  
36  
37  
38  
39  
40

### 41 *Job satisfaction*

42 The respondents' job satisfaction was assessed by the Index of Job Satisfaction (JDI).  
43 The JDI questionnaire contained questions on five independent dimensions, namely,  
44 Work Itself (22 items), Pay (9 items), Promotion (7 items), Co-workers (11 items), and  
45 Supervision (14 items)<sup>14, 15</sup>. Each item was scored Yes=3, ?=1, and No=0, with  
46 negatively worded items being reverse-coded. A JDI score for each respondent was  
47 calculated as the sum of all his/her answers, with the scores of the Promotion and Pay  
48 sections being multiplied by 2. The Cronbach's  $\alpha$  values of the 5 JDI subscales were 0.89,  
49 0.94, 0.88, 0.90, and 0.87, respectively.  
50  
51  
52  
53  
54  
55  
56  
57  
58  
59  
60

### *Work engagement*

Work engagement was measured using the 17-item Utrecht Work Engagement Scale (UWES). The UWES had three subscales: Vigor (6 items), Dedication (5 items) and Absorption (6 items). All items were rated on a 7-point Likert scale (0-6). The sum of all items was used as a UWES score<sup>16-18</sup>. The internal consistency for the UWES questionnaire was presented as a Cronbach's  $\alpha$  value of 0.85.

### *Data analysis*

Data analysis was performed using SPSS 18 (SPSS Inc., Chicago, U.S.). Quantitative data were presented as means  $\pm$  standard deviations (SD). Shapiro-Wilk W test and F test were performed for normality and homogeneity. Independent samples t-test, Wilcoxon rank-sum test, and one-way analysis of variance (ANOVA) were used for the quantitative data of independent groups. Chi-square and Fisher exact tests were used for nominal variables. Statistical significance was considered with a two-tailed p-value less than 0.05.

### *Patient and Public Involvement*

No patients were involved in this study. The public has not been involved in the development of the research or in the study design. The study results will be disseminated to respondents via newsletters and publications.

## **Results**

### *Demographic & practice characteristics of respondents*

A total number of 1,202 neurosurgeons completed the survey. Considering the fact that approximately two-thirds of 11,000 registered neurosurgeons in China have received proper training and are active<sup>19</sup>, the pool of responding neurosurgeons in this study may represent approximately 16% of Chinese neurosurgeons.

The demographic and practice characteristics of responding neurosurgeons were summarized in Table 1. Their mean age was  $34.32 \pm 7.21$  years, with a male to female ratio of 13.14:1. Among the respondents, 956 (79.53%) were married and 50 (4.16%)



1  
2  
3 were divorced. Approximately three-quarters of neurosurgeons had home-living children,  
4 and 23.87% (30.02% of the married) had more than one child. The majority (91.93%) of  
5 responding neurosurgeons worked in public hospitals. They worked an average of  
6 63.91±11.04 hours a week, with an annual income of 11.13±4.85<sup>10</sup><sup>4</sup> RMB  
7 (approximately 16,000±6,990 USD). Interns, residents, attending doctors, and  
8 senior/chief neurosurgeons constituted 3.00%, 27.95%, 42.35%, and 26.71% of all  
9 respondents, respectively. Over one-third (37.94%) of surveyed neurosurgeons claimed  
10 that they had experienced or witnessed workplace violence against doctors or other  
11 medical workers in the last 5 years. Only 6.6% of respondents would encourage their  
12 offspring to become a doctor.  
13  
14  
15  
16  
17  
18  
19  
20  
21

22 Among the 1202 respondents, there were 823 (68.47%) academic and 379 (31.53%) non-  
23 academic neurosurgeons. The two groups had no statistical difference in terms of gender,  
24 age, marital status, and job titles. However, a larger proportion of academic  
25 neurosurgeons were single compared to the non-academic (19.93% vs. 8.44% p<0.01),  
26 and the former preferred to have fewer children after marriage (Table 1). While the  
27 majority (91.93%) of academic neurosurgeons were working in public hospitals, nearly  
28 18% of non-academic neurosurgeons chose to work in private medical facilities (p<0.01,  
29 Table 1). Both academic and non-academic neurosurgeons spent approximately 60 hours  
30 per week on clinical work (56.17±9.12 vs. 61.42±7.92 hours, p<0.01). For the academic  
31 neurosurgeons, they required additional 8.21±4.64 hours per week on teaching and  
32 research such as university lectures, lab work, clinical trials, paper writing, etc., making  
33 their average working hours significantly longer than that of the non-academic (p<0.01,  
34 Table 1). Accordingly, the average annual income of the academic neurosurgeons was  
35 statistically higher than that of their non-academic colleagues (11.37±4.29<sup>10</sup><sup>4</sup> RMB,  
36 16,300±6,100 USD vs. 10.02±5.21<sup>10</sup><sup>4</sup> RMB,14,300±7,500 USD, p<0.01). The gap in  
37 income was also reflected by the difference in proportions of high-income individuals  
38 (Table 1). Some other notable difference included that the non-academic neurosurgeons  
39 had a higher risk of experiencing or witnessing workplace violence (44.06% vs. 35.12%,  
40 p<0.01). Additionally, it is worth noting that the academic neurosurgeons were less likely  
41 to encourage their child(ren) to become a doctor (p<0.01) (Table 1).  
42  
43  
44  
45  
46  
47  
48  
49  
50  
51  
52  
53  
54  
55  
56

### *Career Burnout*

Career Burnout was assessed by the 22-item MBI-HSS questionnaire and summarized in Table 2. Overall, 44.51% of responding neurosurgeons were burnout. There were 36.11% of respondents showing high levels of Emotional Exhaustion, 29.62% with high Depersonalization and 12.26% with a low sense of Personal Accomplishment (Table 2). Although the academic neurosurgeons had longer weekly working hours and more workload, the incidence of burnout was significantly lower among the academic neurosurgeons (37.91% vs. 58.84%,  $p<0.01$ ). In fact, the academic neurosurgeons scored better in all three assessed dimensions ( $p<0.01$ ,  $p<0.01$ , and  $p<0.01$ , respectively, Table 2). Additional analysis was performed to illustrate the difference in burnout rate among neurosurgeons with different job titles. Table 3 indicates that the non-academic neurosurgeons at all levels had higher burnout rates than their academic colleagues. In addition, for both academic and non-academic respondents, the senior/chief neurosurgeons were less likely being burnout than intern/resident or attending neurosurgeons (Table 3).

### *Job satisfaction*

Job satisfaction was measured by JDI and the five subscales (Table 4). The mean JDI score for all surveyed neurosurgeons was  $102.60\pm 36.63$ . Previous studies have been conducted in other countries using JDI to measure job satisfaction. For example, Rahnavard et al., and Lee et al., reported a mean JDI between 175-190 of mental health professionals and nursing staff<sup>20, 21</sup>. A JDI of 102 of this study is significantly lower than the scores reported by other authors, indicating a lower level of job satisfaction. Interestingly, the academic neurosurgeons showed significantly higher scores (being more satisfied) when they were asked to comment on Work Itself, Promotion, and Supervision ( $p<0.01$ ,  $p<0.01$ , and  $p<0.01$ , respectively, Table 4). There was no statistical difference in the comments on Pay and Coworker ( $p=0.059$  and  $0.45$ , respectively, Table 3).

### *Work engagement*

1  
2  
3 The UWES scores indicated the difference in work engagement between the academic  
4 and non-academic neurosurgeons (Table 5). Overall, the academic neurosurgeons scored  
5 higher (being more enthusiastic for work) than their non-academic colleagues ( $p=0.015$ ).  
6 For UWES subscales, academic neurosurgeons were more dedicated to work ( $p<0.01$ ).  
7 Yet the academic and non-academic neurosurgeons showed no difference in the Vigor  
8 and Absorption assessment ( $p=0.057$ ,  $p=0.059$ , respectively, Table 5).  
9  
10  
11  
12  
13  
14

### 15 *Multivariate analysis*

16  
17 Multivariate regression analyzation indicated that, for both academic and non-academic  
18 neurosurgeons, being divorced, having one (or the first) home-living child, working as  
19 attending doctors, prolonged working hours ( $\geq 71$  hours per week), low annual income  
20 ( $<100,000$  RMB,  $\sim 14,400$  USD), and workplace violence were significantly related to  
21 professional burnout (Table 6). For non-academic neurosurgeons, working in public  
22 hospitals was an independent risk factor for burnout (OR 5.37, 95% CI 2.969-9.67,  
23  $p<0.01$ ). In addition, surgeons' age, number of home-living children, and job titles were  
24 associated with burnout among non-academic neurosurgeons but not the academic  
25 respondents (Table 6). Subgroup analysis also indicated that academic neurosurgeons  
26 may have a relatively lower expectation of income. While the annual income between  
27 110,000-150,000 RMB (14,400-21,600 USD) was related to professional burnout among  
28 the academic neurosurgeons (OR 0.63, 95% CI 0.46-0.86,  $p<0.01$ ), a similar association  
29 was only observed when the annual income exceeded 160,000 RMB (23,000 USD)  
30 among the non-academic respondents (OR 0.29, 95% CI 0.15-0.58,  $p<0.01$ , Table 6).  
31  
32  
33  
34  
35  
36  
37  
38  
39  
40  
41  
42

### 43 **Discussion**

44  
45 There is no doubt that Chinese neurosurgery has made a remarkable improvement in the  
46 past decades<sup>3, 4, 6</sup>. On the stage of today's neurosurgery, the voice of the Chinese can  
47 often be heard. In spite of the fact that Chinese neurosurgery has shown progresses not  
48 only in the case numbers and operating techniques but also in the amount and quality of  
49 academic research, little attention has been paid to the working status of Chinese  
50 neurosurgical surgeons to date.  
51  
52  
53  
54  
55  
56  
57  
58  
59  
60

1  
2  
3 In this study, a national survey was conducted to address this issue. Our survey indicates  
4 that Chinese neurosurgeons are under great pressure. Vast workload, prolonged working  
5 hours, high incidence of burnout and low job satisfaction have been noted among all  
6 levels of neurosurgeons. Professional burnout has been previously investigated among  
7 neurosurgeons in the U.S. (27%-56.7% of neurosurgeons being burnout) <sup>11, 13</sup> and in  
8 Europe (one-quarter of neurosurgeons being burnout) <sup>22</sup>. A recent meta-analysis found  
9 that the global prevalence of burnout of residents was 51%<sup>23</sup>. However, this study did not  
10 report the prevalence of burnout of neurosurgery residents. In this study, the burnout ratio  
11 of Chinese neurosurgeons was 44.51%, which was similar to the results of the U.S. but  
12 significantly higher than that of Europe. An interesting finding is that, although the  
13 academic neurosurgeons have heavier workloads and longer working hours than the non-  
14 academic neurosurgeons, they are more satisfied with their jobs, more committed to the  
15 work, and less likely to experience professional burnout. The reasons for the phenomena  
16 are complex, and yet we speculate several possible explanations, discussed as follows.

17  
18  
19  
20  
21  
22  
23  
24  
25  
26  
27  
28  
29 First of all, the income gap may play an important role. Our survey indicated that one of  
30 the most apparent differences between Chinese academic and non-academic  
31 neurosurgeons is that the former had a higher annual income (Table 1). It has been  
32 demonstrated in multiple industries that pay is one of the most important contributors for  
33 job satisfaction, work engagement, and, consequently, professional burnout<sup>13, 24-26</sup>.  
34 Currently, Chinese tertiary hospitals are attracting an increasing number of patients due  
35 to reputations and skillful physicians. Under the principle of performance appraisal which  
36 has been widely accepted by Chinese health care facilities, academic neurosurgeons have  
37 good reasons to be paid better than those working in regional hospitals. However, it does  
38 not imply that neurosurgeons are individuals with high-income. On the contrary, although  
39 neurosurgeons are paid approximately 100,000 to 110,000 RMB (14,400-15,800 USD)  
40 annually, which is 1.11-1.22 times more than the average salary of Chinese urban  
41 employees (89,993 RMB, 13,000 USD, data from the National Bureau of Statistics of  
42 China, <http://data.stats.gov.cn/easyquery.htm?cn=C01>), neurosurgeons are actually  
43 underpaid considering their prolonged training, long working hours (nearly 70 hours per  
44 week), and vast workload.

1  
2  
3  
4  
5 Second, academic neurosurgeons may have better career development. As employees of  
6 university hospitals and national medical centers, academic neurosurgeons have more  
7 opportunities to get funding support and build collaborations, which is crucial for  
8 research breakthroughs and development of personal career. According to the records of  
9 WFNS ([www.wfns.org](http://www.wfns.org)), AANS (American Association of Neurological Surgeons,  
10 [www.aans.org](http://www.aans.org)), and EANS (European Association of Neurosurgical Societies,  
11 [www.eans.org](http://www.eans.org)), the three major organizations each holding an international neurosurgical  
12 conference annually, the majority of Chinese speakers or poster authors of those meetings  
13 came from tertiary hospitals. In addition, the database from ClinicalTrials  
14 ([www.clinicaltrials.gov](http://www.clinicaltrials.gov)) and Chinese Clinical Trial Registry (ChiCTR,  
15 [www.chictr.org.cn](http://www.chictr.org.cn)) indicates that the majority of multi-center projects are led or  
16 exclusively recruit partners from tertiary hospitals. The advantages in career development,  
17 especially the chance of getting support at a national level and the opportunities of setting  
18 international collaborations with world-leading research facilities, may provide academic  
19 neurosurgeons a sense of superiority, and consequently, have positive impacts on job  
20 satisfaction and engagement <sup>27</sup>.  
21  
22  
23  
24  
25  
26  
27  
28  
29  
30  
31  
32  
33

34 Thirdly, tertiary hospitals provide a safer work environment. During the last two decades,  
35 the deterioration of the doctor-patient relationship has become a major issue in the  
36 Chinese medical system. Chinese doctors have been threatened by a surge of workplace  
37 violence. In 2017, the Chinese Medical Doctor Association (CMDA) released the latest  
38 version of “*White paper on medical practice in China*”, showing that 66% of Chinese  
39 physicians were involved in doctor-patient conflicts  
40 ([www.cmda.net/u/cms/www/201807/06181247ffex.pdf](http://www.cmda.net/u/cms/www/201807/06181247ffex.pdf)). The increase of doctor-patient  
41 conflicts has a significant impact on physician burnout, mental health, job satisfaction,  
42 and drop-out <sup>9, 28</sup>. In our survey, nearly 40% of neurosurgeons have encountered  
43 workplace violence in the last five years. Nevertheless, the incidence among academic  
44 neurosurgeons was significantly lower than that among non-academic neurosurgeons.  
45 One possible explanation is that university teaching hospitals and national medical  
46 centers provide better security service than regional hospitals do. In addition, the public  
47  
48  
49  
50  
51  
52  
53  
54  
55  
56  
57  
58  
59  
60

1  
2  
3 holds the view that surgeons in tertiary hospitals are more skilled and better equipped. It  
4 is believed that academic neurosurgeons represent the highest level in this country, hence  
5 more respect and fewer conflicts are expected.  
6  
7  
8  
9

10 The gap of pay, career development, and safety between academic and non-academic  
11 neurosurgeons have attracted an increasing number of young talents to work in tertiary  
12 hospitals. If the gap continues to exist or even widens further, an inevitable consequence  
13 is that patients would prefer to choose tertiary hospitals even if their disorders could be  
14 well treated in regional hospitals. This trend would lead to an imbalance in medical  
15 resources and affect the quality of medical care. In order to solve the problem, in 2016  
16 the Chinese authority initiated a new standardization training program requiring all  
17 Chinese neurosurgeons, particularly those working in regional hospitals, to finish an extra  
18 4 years of specialist training. The intention of this reform is to enable all Chinese  
19 neurosurgeons to receive standardized training and to narrow their gap in skills and  
20 knowledge. In the meanwhile, the research management agencies, such as the Nature  
21 Science Foundation of China and many local foundations, have also provided increasing  
22 support for projects from regional hospitals.  
23  
24  
25  
26  
27  
28  
29  
30  
31  
32  
33

34 This study has a few limitations. First of all, selection bias may exist during the process  
35 of the survey. There are approximately 11,000 registered neurosurgeons in China<sup>5</sup>. This  
36 is the largest group of neurosurgical specialists in the world. Although the number of  
37 1202 respondents was similar to the U.S. study and significantly larger than studies in  
38 other countries<sup>13, 22</sup>, the results of this study may only represent 16% of all Chinese  
39 neurosurgeons. Individuals who suffer from significant burnout or low morale were less  
40 likely to complete a voluntary survey. In other words, the survey may have provided  
41 more optimistic data. Moreover, the questionnaires were distributed electronically via  
42 smart-phone APPs and web pages, which may recruit more young respondents than for  
43 elder surgeons. Second, for easier understanding and analysis, we simply considered  
44 neurosurgeons working in tertiary hospitals as the academic and those in regional  
45 hospitals as the non-academic. However, researches in regional hospitals are actually not  
46 down to zero. The Chinese healthcare system requires every doctor to publish at least two  
47  
48  
49  
50  
51  
52  
53  
54  
55  
56

1  
2  
3 papers as one of the premise conditions for promotion, regardless of the type of hospital.  
4 In major cities such as Beijing and Shanghai, the conditions for promotion are more  
5 demanding, requesting publications in high standard international journals. Therefore,  
6 neurosurgeons in regional hospitals also conduct clinical or basic researches, although  
7 these researches are usually limited and under the help of tertiary hospitals. However,  
8 under the aforementioned new policy, it is a fact that some non-academic neurosurgeons  
9 were devoted to research and have made remarkable achievements. Although their  
10 number is limited, these “non-academic” neurosurgeons could stay as potential  
11 confounders in this anonymous survey. Finally, further studies are required to illustrate  
12 the difference in job satisfaction and work engagement among neurosurgeons of different  
13 titles. A comparison to other clinical specialists would also be interesting for future  
14 investigations.  
15  
16  
17  
18  
19  
20  
21  
22  
23  
24

## 25 **Conclusion**

26 This study reveals the working status of Chinese neurosurgeons. It also illustrates the  
27 difference between academic and the non-academic neurosurgeons in China. Our data  
28 suggests that Chinese neurosurgeons are under stress, particularly for those working in  
29 regional hospitals. We hope this study will promote reforms for better support and a safer  
30 working environment for Chinese neurosurgeons. We also hope this study may offer  
31 valuable information for medical students and young talents who would choose  
32 neurosurgery, a promising but challenging profession, as a career.  
33  
34  
35  
36  
37  
38  
39  
40

41 Fortunately, the Chinese authority recently has increasingly emphasized the legitimate  
42 rights and interests of medical workers. In addition, starting from 2018, it will be the  
43 August 19th of each year as the Chinese Physician's Day. All in all, having healthy and  
44 professionally satisfied physicians including neurosurgeons is the essential precondition  
45 for improved health care. The change may take a long time, but the future is promising.  
46  
47  
48  
49  
50

## 51 **Funding**

52 This work was supported by Shanghai Municipal Science and Technology Commission  
53 project (16411955300, 18441903300), Shanghai Municipal Commission of Health and  
54  
55  
56

1  
2  
3 Family Planning project (201840063, 201801075), The Major and Develop Project of  
4 Chinese Ministry of Science and Technology (2017ZX09304005), the Public Medical  
5 Artificial Intelligence Training Platform (XX-RGZN-01-17-4684), and Shanghai  
6 Minhang Nature Science Foundation project (2018MHZ007).  
7  
8  
9

### 10 11 12 **Competing interests**

13 None declared.  
14  
15

### 16 17 **Ethics approval**

18 The Ethics Review Committee of Huashan Hospital, Fudan University approved the  
19 study design and the collection of the data through the questionnaire.  
20  
21  
22

### 23 24 **Data sharing statement**

25 All data relevant to the study are included in the article or uploaded as supplementary  
26 information.  
27  
28  
29

### 30 31 **Contributors**

32 JY and YS drafted the manuscript and were involved in the interpretation of the data. JG  
33 and JC performed statistical analyses. JY, JC, and YS played a major role in  
34 questionnaire development. All the authors read and approved the final manuscript.  
35  
36  
37  
38

### 39 40 **Acknowledgments:**

41 We thank Dr. Fei Zou, Dr. Jian Yu, Dr. Jianping Song, and Dr. Jingjing Xia for  
42 supporting this study. We also thank Diane Bartram for proofreading and suggestions  
43 during the revision.  
44  
45  
46  
47  
48  
49

### 50 51 **Reference**

- 52 1. Wang C, Mao Y, Zhu JH, et al. The Department of Neurosurgery at Shanghai Huashan  
53 Hospital. *Neurosurgery*. 2008;62(4):947-52; discussion 52-3.
- 54 2. Chou SN. Perspectives in international neurosurgery: a glimpse of neurosurgery in China.  
55 *Neurosurgery*. 1978;3(1):120-2.  
56



3. Ausman JI. The rise of Chinese neurosurgery and neurosurgery in the developing world, and scientific colonialism. *Surg Neurol*. 2007;67(3):323-5.
4. Zhao JZ, Zhou LF, Zhou DB, et al. The status quo of neurosurgery in China. *Neurosurgery*. 2008;62(2):516-20; discussion 20-1.
5. Societies WfN. Global Neurosurgical Workforce Map [cited 2018 September 27]. Available from: <https://www.wfns.org/menu/61/global-neurosurgical-workforce-map>.
6. Hauptman JS, Chow DS, Martin NA, et al. Research productivity in neurosurgery: trends in globalization, scientific focus, and funding. *J Neurosurg*. 2011;115(6):1262-72.
7. Wu D, Wang Y, Lam KF, et al. Health system reforms, violence against doctors and job satisfaction in the medical profession: a cross-sectional survey in Zhejiang Province, Eastern China. *BMJ Open*. 2014;4(12):e006431.
8. Tijdink JK, Vergouwen AC, Smulders YM. Emotional exhaustion and burnout among medical professors; a nationwide survey. *BMC medical education*. 2014;14:183.
9. Wang YX, Kaplar Z, L YT. AME survey-003 A1-part 2: the motivation factors of medical doctors in China. *Quantitative imaging in medicine and surgery*. 2015;5(6):917-24.
10. Rotenstein LS, Torre M, Ramos MA, et al. Prevalence of Burnout Among Physicians: A Systematic Review. *Jama*. 2018;320(11):1131-50.
11. Klimo P, Jr., DeCuypere M, Ragel BT, et al. Career satisfaction and burnout among U.S. neurosurgeons: a feasibility and pilot study. *World Neurosurg*. 2013;80(5):e59-68.
12. Shanafelt TD, Balch CM, Bechamps GJ, et al. Burnout and career satisfaction among American surgeons. *Annals of surgery*. 2009;250(3):463-71.
13. McAbee JH, Ragel BT, McCartney S, et al. Factors associated with career satisfaction and burnout among US neurosurgeons: results of a nationwide survey. *J Neurosurg*. 2015;123(1):161-73.
14. Hulin CL, Smith PC. A linear model of job satisfaction. *Journal of Applied Psychology*. 1965;49(3):209.
15. Smith PC, Kendall LM, Hulin CL. The measurement of satisfaction in work and retirement. . Chicago: Rand McNally; 1969.
16. Schaufeli WB, Salanova M, Gonzálezromá V, et al. The Measurement of Engagement and Burnout: A Two Sample Confirmatory Factor Analytic Approach. *Journal of Happiness Studies*. 2002;3(1):71-92.
17. Schaufeli WB, Bakker AB. Job demands, job resources, and their relationship with burnout and engagement: a multi-sample study. *Journal of Organizational Behavior*. 2004;25(3):293-315.
18. Fong TC, Ng SM. Measuring engagement at work: validation of the Chinese version of the Utrecht Work Engagement Scale. *Int J Behav Med*. 2012;19(3):391-7.
19. Zhang YQ, Xue C, Mao Y, et al. [Current status and development of Chinese neurosurgeons]. *Chinese Journal of Neurosurgery*. 2011;27(3):217-9.
20. Lee CD, del Carmen Montiel E. The correlation of mentoring and job satisfaction: a pilot study of mental health professionals. *Community mental health journal*. 2011;47(4):482-7.
21. Rahnavard F, Sadati AK, Hemmati S, et al. The impact of environmental and demographic factors on nursing job satisfaction. *Electronic physician*. 2018;10(4):6712-7.
22. Pranckeviciene A, Tamasauskas A, Deltuva VP, et al. Professional burnout and its correlates in Lithuanian neurosurgeons. *Acta Neurochir (Wien)*. 2016;158(8):1437-45.

- 1  
2  
3 23. Low ZX, Yeo KA, Sharma VK, et al. Prevalence of Burnout in Medical and Surgical Residents:  
4 A Meta-Analysis. *International journal of environmental research and public health*.  
5 2019;16(9).  
6  
7 24. Judge TA, Piccolo RF, Podsakoff NP, et al. The relationship between pay and job satisfaction:  
8 A meta-analysis of the literature. *Journal of Vocational Behavior*. 2010;77(2):157-67.  
9  
10 25. Kulikowski K, Sedlak P. Can you buy work engagement? The relationship between pay, fringe  
11 benefits, financial bonuses and work engagement. *Current Psychology*. 2017:1-11.  
12  
13 26. Stringer C, Didham J, Theivananthampillai P. Motivation, pay satisfaction, and job satisfaction  
14 of front-line employees. *Qualitative Research in Accounting & Management*. 2011;8(2):161-79.  
15  
16 27. de Oliveira Vasconcelos Filho P, de Souza MR, Elias PE, et al. Physicians' job satisfaction and  
17 motivation in a public academic hospital. *Hum Resour Health*. 2016;14(1):75.  
18  
19 28. Wang Y, Fang M, Wang Y. How to decrease violence against doctors in China? *Int J Cardiol*.  
20 2016;211:66.  
21  
22  
23  
24  
25  
26  
27  
28  
29  
30  
31  
32  
33  
34  
35  
36  
37  
38  
39  
40  
41  
42  
43  
44  
45  
46  
47  
48  
49  
50  
51  
52  
53  
54  
55  
56  
57  
58  
59  
60

**Table 1. Demographic & practice characteristics of respondents**

|                                                                       | All Neurosurgeons<br>(n=1202) |       | Academic (n=823) |       | Non-academic<br>(n=379) |       | p-value* |
|-----------------------------------------------------------------------|-------------------------------|-------|------------------|-------|-------------------------|-------|----------|
|                                                                       | n                             | %     | n                | %     | n                       | %     |          |
| Gender                                                                |                               |       |                  |       |                         |       |          |
| Male                                                                  | 1117                          | 92.93 | 757              | 91.98 | 360                     | 94.99 | 0.069    |
| Female                                                                | 85                            | 7.07  | 66               | 8.02  | 19                      | 5.01  | 0.069    |
| Age                                                                   |                               |       |                  |       |                         |       |          |
| ≤35                                                                   | 586                           | 48.75 | 406              | 49.33 | 180                     | 47.49 | 0.58     |
| 36-45                                                                 | 439                           | 36.52 | 307              | 37.30 | 132                     | 34.83 | 0.41     |
| 46-55                                                                 | 158                           | 13.14 | 99               | 12.03 | 59                      | 15.57 | 0.092    |
| ≥56                                                                   | 19                            | 1.58  | 11               | 1.34  | 8                       | 2.11  | 0.47     |
| Marital status                                                        |                               |       |                  |       |                         |       |          |
| Married                                                               | 956                           | 79.53 | 630              | 76.55 | 326                     | 86.02 | <0.01    |
| Unmarried                                                             | 196                           | 16.31 | 164              | 19.93 | 32                      | 8.44  | <0.01    |
| Divorced                                                              | 50                            | 4.16  | 29               | 3.52  | 21                      | 5.54  | 0.11     |
| Number of kids<br>( married only)                                     |                               |       |                  |       |                         |       |          |
| 0                                                                     | 80                            | 8.37  | 74               | 11.75 | 6                       | 1.84  | <0.01    |
| 1                                                                     | 589                           | 61.61 | 392              | 62.22 | 197                     | 60.43 | 0.59     |
| ≥2                                                                    | 287                           | 30.02 | 164              | 26.03 | 123                     | 37.73 | <0.01    |
| Nature of current<br>employer                                         |                               |       |                  |       |                         |       |          |
| Public                                                                | 1105                          | 91.93 | 794              | 96.48 | 311                     | 82.06 | <0.01    |
| Private                                                               | 97                            | 8.07  | 29               | 3.52  | 68                      | 17.94 | <0.01    |
| Professional status                                                   |                               |       |                  |       |                         |       |          |
| Intern                                                                | 36                            | 3.00  | 25               | 3.04  | 11                      | 2.90  | 0.99     |
| Resident                                                              | 336                           | 27.95 | 241              | 29.28 | 95                      | 25.07 | 0.13     |
| Attending doctor                                                      | 509                           | 42.35 | 342              | 41.56 | 167                     | 44.06 | 0.41     |
| Senior/Chief                                                          | 321                           | 26.71 | 215              | 26.12 | 106                     | 27.97 | 0.50     |
| Working hours per<br>week (hours, mean ±sd)                           |                               |       |                  |       |                         |       |          |
| Total                                                                 | 63.91±11.04                   | /     | 64.39±9.63       | /     | 61.92±8.34              | /     | <0.01    |
| Clinic                                                                | 58.19±10.34                   | /     | 56.17±9.12       | /     | 61.42±7.92              | /     | <0.01    |
| Research                                                              | 5.72±3.67                     | /     | 8.21±4.64        | /     | 0.53±0.36               | /     | <0.01    |
| Annual income<br>(10,000RMB)                                          |                               |       |                  |       |                         |       |          |
| <6                                                                    | 202                           | 16.81 | 121              | 14.70 | 81                      | 21.37 | <0.01    |
| 6-10                                                                  | 384                           | 31.95 | 231              | 28.07 | 153                     | 40.37 | <0.01    |
| 11-15                                                                 | 366                           | 30.45 | 264              | 32.08 | 102                     | 26.91 | 0.071    |
| 16-20                                                                 | 172                           | 14.31 | 140              | 17.01 | 32                      | 8.44  | <0.01    |
| ≥20                                                                   | 78                            | 6.49  | 67               | 8.14  | 11                      | 2.90  | <0.01    |
| Experience or witness<br>of workplace violence<br>in the last 5 years |                               |       |                  |       |                         |       |          |
| Yes                                                                   | 456                           | 37.94 | 289              | 35.12 | 167                     | 44.06 | <0.01    |
| Encouraging child to<br>become a doctor                               |                               |       |                  |       |                         |       |          |
| Yes                                                                   | 80                            | 6.66  | 55               | 6.68  | 25                      | 6.60  | 0.99     |
| No                                                                    | 876                           | 72.88 | 573              | 69.62 | 303                     | 79.95 | <0.01    |
| Not sure                                                              | 246                           | 20.47 | 195              | 23.69 | 51                      | 13.46 | <0.01    |

\* The p-values indicate the difference between the academic and non-academic neurosurgeons. A p-value less than 0.05 is considered as statistical significance.

**Table 2. Burnout measured by MBI-HSS**

| Burnout Subscales       | All Neurosurgeons<br>(n=1202) |       | Academic<br>(n=823) |       | Non-academic<br>(n=379) |       | p-value* |
|-------------------------|-------------------------------|-------|---------------------|-------|-------------------------|-------|----------|
|                         | n                             | %     | n                   | %     | n                       | %     |          |
| Emotional Exhaustion    |                               |       |                     |       |                         |       |          |
| Low                     | 195                           | 16.22 | 136                 | 16.52 | 59                      | 15.57 | 0.68     |
| Intermediate            | 573                           | 47.67 | 414                 | 50.30 | 159                     | 41.95 | <0.01    |
| High                    | 434                           | 36.11 | 273                 | 33.17 | 161                     | 42.48 | <0.01    |
| Depersonalization       |                               |       |                     |       |                         |       |          |
| Low                     | 543                           | 45.17 | 394                 | 47.87 | 149                     | 39.31 | <0.01    |
| Intermediate            | 303                           | 25.21 | 253                 | 30.74 | 50                      | 13.19 | <0.01    |
| High                    | 356                           | 29.62 | 176                 | 21.39 | 180                     | 47.49 | <0.01    |
| Personal Accomplishment |                               |       |                     |       |                         |       |          |
| Low                     | 533                           | 44.34 | 363                 | 44.11 | 170                     | 44.85 | 0.81     |
| Intermediate            | 518                           | 43.09 | 376                 | 45.69 | 142                     | 37.47 | <0.01    |
| High                    | 151                           | 12.56 | 84                  | 10.21 | 67                      | 17.68 | <0.01    |
| Burnout                 | 535                           | 44.51 | 312                 | 37.91 | 223                     | 58.84 | <0.01    |

\* The p-values indicate the difference between the academic and non-academic neurosurgeons. A p-value less than 0.05 is considered as statistical significance.

**Table 3. Burnout measured by MBI-HSS among neurosurgeons with different job titles**

|                  | All neurosurgeons |                           | Academic |                          | Non-academic |                          | p-value*        |
|------------------|-------------------|---------------------------|----------|--------------------------|--------------|--------------------------|-----------------|
|                  | n                 | Burnout, n(%)             | n        | Burnout, n(%)            | n            | Burnout, n(%)            |                 |
| Intern/Resident  | 372               | 162(43.54)                | 266      | 108(40.60)               | 106          | 63(59.43)                | <b>&lt;0.01</b> |
| Attending doctor | 509               | 253(49.71)                | 342      | 145(42.40)               | 167          | 115(68.86)               | <b>&lt;0.01</b> |
| Senior/Chief     | 321               | 120(37.38) <sup># †</sup> | 215      | 59(27.44) <sup># †</sup> | 106          | 45(42.45) <sup># †</sup> | <b>&lt;0.01</b> |

\* The p-values indicate the difference between the academic and non-academic neurosurgeons. A p-value less than 0.05 is considered as statistical significance.

# There were statistic differences in the burnout rates between the group of Intern/Resident and the Senior/Chief neurosurgeons

† There were statistic differences in the burnout rate between the group of Attending doctor and the Senior/Chief neurosurgeons

For peer review only

**Table 4. Job satisfaction measured by JDI**

| JDI Subscales | All Neurosurgeons<br>(n=1202) |       | Academic<br>(n=823) |       | Non-academic<br>(n=379) |       | p-value*        |
|---------------|-------------------------------|-------|---------------------|-------|-------------------------|-------|-----------------|
|               | Mean                          | Sd    | Mean                | Sd    | Mean                    | Sd    |                 |
| JDI Score     | 102.60                        | 36.63 | 107.04              | 36.48 | 92.95                   | 35.12 | <b>&lt;0.01</b> |
| Work Itself   | 24.27                         | 11.76 | 24.55               | 11.93 | 22.30                   | 12.49 | <b>&lt;0.01</b> |
| Pay           | 7.44                          | 4.22  | 7.60                | 4.09  | 7.11                    | 4.84  | 0.059           |
| Promotion     | 6.73                          | 4.55  | 7.09                | 4.29  | 5.92                    | 4.99  | <b>&lt;0.01</b> |
| Supervision   | 25.44                         | 13.35 | 27.14               | 13.83 | 21.76                   | 11.41 | <b>&lt;0.01</b> |
| Coworker      | 24.53                         | 10.60 | 25.32               | 10.76 | 24.83                   | 10.07 | 0.45            |

\* The p-values indicate the difference between the academic and non-academic neurosurgeons. A p-value less than 0.05 is considered as statistical significance.

**Table 5. Job engagement measured by UWES**

| UWES Subscales | All Neurosurgeons<br>(n=1202) |       | Academic<br>(n=823) |       | Non-academic<br>(n=379) |       | p-value*        |
|----------------|-------------------------------|-------|---------------------|-------|-------------------------|-------|-----------------|
|                | Mean                          | Sd    | Mean                | Sd    | Mean                    | Sd    |                 |
| UWES Score     | 61.27                         | 26.21 | 62.52               | 25.53 | 58.55                   | 27.49 | <b>0.015</b>    |
| Vigor          | 22.04                         | 9.48  | 22.39               | 9.37  | 21.28                   | 9.69  | 0.059           |
| Dedication     | 18.03                         | 8.83  | 18.57               | 8.48  | 16.86                   | 9.46  | <b>&lt;0.01</b> |
| Absorption     | 21.20                         | 9.75  | 21.57               | 9.55  | 20.41                   | 10.13 | 0.057           |

\* The p-values indicate the difference between the academic and non-academic neurosurgeons. A p value less than 0.05 is considered as statistical significance.

**Table 6. Multivariate analysis on burnout**

|                                                                 | All Neurosurgeons (n=1202) |            |                 | Academic(n=823) |            |                 | Non-academic(n=379) |            |                 |
|-----------------------------------------------------------------|----------------------------|------------|-----------------|-----------------|------------|-----------------|---------------------|------------|-----------------|
|                                                                 | OR                         | 95% CI     | p-value         | OR              | 95% CI     | p-value         | OR                  | 95% CI     | p value         |
| Gender                                                          |                            |            |                 |                 |            |                 |                     |            |                 |
| Male                                                            | 1.43                       | 0.91-2.26  | 0.14            | 1.44            | 0.84-2.49  | 0.23            | 1.04                | 0.41-2.65  | 0.99            |
| Age                                                             |                            |            |                 |                 |            |                 |                     |            |                 |
| ≤35                                                             | 1.07                       | 0.85-1.35  | 0.55            | 1.11            | 0.84-1.47  | 0.46            | 1.045               | 0.69-1.58  | 0.82            |
| 36-45                                                           | 1.20                       | 0.95-1.52  | 0.13            | 1.06            | 0.79-1.12  | 0.70            | 1.75                | 1.12-2.71  | <b>0.013</b>    |
| ≥46                                                             | 0.61                       | 0.43-0.85  | <b>&lt;0.01</b> | 0.70            | 0.45-1.08  | 0.10            | 0.39                | 0.23-0.69  | <b>&lt;0.01</b> |
| Marital status                                                  |                            |            |                 |                 |            |                 |                     |            |                 |
| Married                                                         | 0.71                       | 0.54-0.94  | <b>0.018</b>    | 0.54            | 0.39-0.75  | <b>&lt;0.01</b> | 1.02                | 0.56-1.83  | 0.99            |
| Unmarried                                                       | 0.92                       | 0.68-1.26  | 0.61            | 1.45            | 1.03-20.6  | <b>0.033</b>    | 0.29                | 0.13-0.62  | <b>&lt;0.01</b> |
| Divorced                                                        | 7.02                       | 2.37-15.08 | <b>&lt;0.01</b> | 4.53            | 1.98-10.37 | <b>&lt;0.01</b> | 7.52                | 1.84-28.43 | <b>&lt;0.01</b> |
| Number of kids (married only)                                   |                            |            |                 |                 |            |                 |                     |            |                 |
| 0                                                               | 0.48                       | 0.29-0.80  | <b>&lt;0.01</b> | 0.78            | 0.46-1.33  | 0.43            | 0.17                | 0.075-0.38 | <b>&lt;0.01</b> |
| 1                                                               | 1.47                       | 1.12-1.92  | <b>&lt;0.01</b> | 1.16            | 0.83-1.63  | 0.39            | 2.46                | 1.56-3.98  | <b>&lt;0.01</b> |
| ≥2                                                              | 0.83                       | 0.63-1.11  | 0.21            | 0.95            | 0.65-1.38  | 0.20            | 0.49                | 0.31-0.77  | <b>&lt;0.01</b> |
| Nature of current employer                                      |                            |            |                 |                 |            |                 |                     |            |                 |
| Public hospital                                                 | 1.39                       | 0.91-2.14  | 0.13            | 0.36            | 0.16-0.77  | <b>0.010</b>    | 5.37                | 2.99-9.67  | <b>&lt;0.01</b> |
| Job titles                                                      |                            |            |                 |                 |            |                 |                     |            |                 |
| Intern/resident                                                 | 0.88                       | 0.69-1.12  | 0.29            | 0.99            | 0.74-1.33  | 0.99            | 0.82                | 0.52-1.28  | 0.41            |
| Attending doctor                                                | 1.40                       | 1.12-1.76  | <b>&lt;0.01</b> | 1.05            | 0.79-1.40  | 0.73            | 2.57                | 1.67-3.96  | <b>&lt;0.01</b> |
| Senior/Chief                                                    | 0.74                       | 0.57-0.97  | <b>0.031</b>    | 0.94            | 0.67-1.32  | 0.71            | 0.41                | 0.25-0.64  | <b>&lt;0.01</b> |
| Working hours per week                                          |                            |            |                 |                 |            |                 |                     |            |                 |
| ≤55                                                             | 0.49                       | 0.38-0.63  | <b>&lt;0.01</b> | 0.59            | 0.33-0.61  | <b>&lt;0.01</b> | 0.68                | 0.43-1.08  | 0.10            |
| 56-70                                                           | 0.63                       | 0.49-0.81  | <b>&lt;0.01</b> | 0.47            | 0.34-0.65  | <b>&lt;0.01</b> | 0.99                | 0.64-1.55  | 0.99            |
| ≥71                                                             | 3.12                       | 2.43-3.99  | <b>&lt;0.01</b> | 4.56            | 3.33-6.22  | <b>&lt;0.01</b> | 1.39                | 0.91-2.12  | 0.13            |
| Annual income (10,000RMB)                                       |                            |            |                 |                 |            |                 |                     |            |                 |
| <10                                                             | 1.85                       | 1.47-2.32  | <b>&lt;0.01</b> | 1.82            | 1.37-2.43  | <b>&lt;0.01</b> | 1.33                | 0.88-2.03  | 0.17            |
| 11-15                                                           | 0.76                       | 0.59-0.98  | <b>0.033</b>    | 0.63            | 0.46-0.86  | <b>&lt;0.01</b> | 1.32                | 0.82-2.11  | 0.24            |
| ≥16                                                             | 0.55                       | 0.41-0.74  | <b>&lt;0.01</b> | 0.77            | 0.55-1.07  | 0.12            | 0.29                | 0.15-0.58  | <b>&lt;0.01</b> |
| Experience or witness of workplace violence in the last 5 years |                            |            |                 |                 |            |                 |                     |            |                 |
| Yes                                                             | 1.52                       | 1.18-2.24  | <b>&lt;0.01</b> | 1.42            | 1.15-2.07  | <b>0.011</b>    | 2.03                | 1.50-3.25  | <b>&lt;0.01</b> |

\* A p-value less than 0.05 is considered as statistical significance.



## STROBE Statement

Checklist of items that should be included in reports of observational studies

| Section/Topic             | Item No | Recommendation                                                                                                                                                                             | Reported on Page No |
|---------------------------|---------|--------------------------------------------------------------------------------------------------------------------------------------------------------------------------------------------|---------------------|
| <b>Title and abstract</b> | 1       | (a) Indicate the study's design with a commonly used term in the title or the abstract                                                                                                     | 1                   |
|                           |         | (b) Provide in the abstract an informative and balanced summary of what was done and what was found                                                                                        | 1                   |
| <b>Introduction</b>       |         |                                                                                                                                                                                            |                     |
| Background/rationale      | 2       | Explain the scientific background and rationale for the investigation being reported                                                                                                       | 3-5                 |
| Objectives                | 3       | State specific objectives, including any prespecified hypotheses                                                                                                                           | 5                   |
| <b>Methods</b>            |         |                                                                                                                                                                                            |                     |
| Study design              | 4       | Present key elements of study design early in the paper                                                                                                                                    | 5                   |
| Setting                   | 5       | Describe the setting, locations, and relevant dates, including periods of recruitment, exposure, follow-up, and data collection                                                            | 5-7                 |
| Participants              | 6       | (a) <i>Cohort study</i> —Give the eligibility criteria, and the sources and methods of selection of participants. Describe methods of follow-up                                            | 5                   |
|                           |         | <i>Case-control study</i> —Give the eligibility criteria, and the sources and methods of case ascertainment and control selection. Give the rationale for the choice of cases and controls |                     |
|                           |         | <i>Cross-sectional study</i> —Give the eligibility criteria, and the sources and methods of selection of participants                                                                      |                     |
| Variables                 | 7       | (b) <i>Cohort study</i> —For matched studies, give matching criteria and number of exposed and unexposed                                                                                   | N/A                 |
|                           |         | <i>Case-control study</i> —For matched studies, give matching criteria and the number of controls per case                                                                                 |                     |
|                           |         | Clearly define all outcomes, exposures, predictors, potential confounders, and effect modifiers. Give diagnostic criteria, if applicable                                                   | 5-7                 |
| Data sources/measurement  | 8*      | For each variable of interest, give sources of data and details of methods of assessment (measurement). Describe comparability of assessment methods if there is more than one group       | 5-7                 |
| Bias                      | 9       | Describe any efforts to address potential sources of bias                                                                                                                                  | 5                   |
| Study size                | 10      | Explain how the study size was arrived at                                                                                                                                                  | 5                   |
| Quantitative variables    | 11      | Explain how quantitative variables were handled in the analyses. If applicable, describe which groupings were chosen and why                                                               | 7                   |
| Statistical methods       | 12      | (a) Describe all statistical methods, including those used to control for confounding                                                                                                      | 7                   |
|                           |         | (b) Describe any methods used to examine subgroups and interactions                                                                                                                        | 7                   |
|                           |         | (c) Explain how missing data were addressed                                                                                                                                                | N/A                 |
|                           |         | (d) <i>Cohort study</i> —If applicable, explain how loss to follow-up was addressed                                                                                                        | N/A                 |
|                           |         | <i>Case-control study</i> —If applicable, explain how matching of cases and controls was addressed                                                                                         |                     |
|                           |         | <i>Cross-sectional study</i> —If applicable, describe analytical methods taking account of sampling strategy                                                                               |                     |
|                           |         | (e) Describe any sensitivity analyses                                                                                                                                                      | 7                   |

| Section/Topic            | Item No | Recommendation                                                                                                                                                                                               | Reported on Page No |
|--------------------------|---------|--------------------------------------------------------------------------------------------------------------------------------------------------------------------------------------------------------------|---------------------|
| <b>Results</b>           |         |                                                                                                                                                                                                              |                     |
| Participants             | 13*     | (a) Report numbers of individuals at each stage of study—eg numbers potentially eligible, examined for eligibility, confirmed eligible, included in the study, completing follow-up, and analysed            | 5                   |
|                          |         | (b) Give reasons for non-participation at each stage                                                                                                                                                         | N/A                 |
|                          |         | (c) Consider use of a flow diagram                                                                                                                                                                           | N/A                 |
| Descriptive data         | 14*     | (a) Give characteristics of study participants (eg demographic, clinical, social) and information on exposures and potential confounders                                                                     | 7-8                 |
|                          |         | (b) Indicate number of participants with missing data for each variable of interest                                                                                                                          | N/A                 |
|                          |         | (c) <i>Cohort study</i> —Summarise follow-up time (eg, average and total amount)                                                                                                                             | N/A                 |
| Outcome data             | 15*     | <i>Cohort study</i> —Report numbers of outcome events or summary measures over time                                                                                                                          | N/A                 |
|                          |         | <i>Case-control study</i> —Report numbers in each exposure category, or summary measures of exposure                                                                                                         | N/A                 |
|                          |         | <i>Cross-sectional study</i> —Report numbers of outcome events or summary measures                                                                                                                           | 8-10                |
| Main results             | 16      | (a) Give unadjusted estimates and, if applicable, confounder-adjusted estimates and their precision (eg, 95% confidence interval). Make clear which confounders were adjusted for and why they were included | 8-10                |
|                          |         | (b) Report category boundaries when continuous variables were categorized                                                                                                                                    | 8-10                |
|                          |         | (c) If relevant, consider translating estimates of relative risk into absolute risk for a meaningful time period                                                                                             | N/A                 |
| Other analyses           | 17      | Report other analyses done—eg analyses of subgroups and interactions, and sensitivity analyses                                                                                                               | 8-9                 |
| <b>Discussion</b>        |         |                                                                                                                                                                                                              |                     |
| Key results              | 18      | Summarise key results with reference to study objectives                                                                                                                                                     | 10-11               |
| Limitations              | 19      | Discuss limitations of the study, taking into account sources of potential bias or imprecision. Discuss both direction and magnitude of any potential bias                                                   | 13-14               |
| Interpretation           | 20      | Give a cautious overall interpretation of results considering objectives, limitations, multiplicity of analyses, results from similar studies, and other relevant evidence                                   | 11-13               |
| Generalisability         | 21      | Discuss the generalisability (external validity) of the study results                                                                                                                                        | 13-14               |
| <b>Other Information</b> |         |                                                                                                                                                                                                              |                     |
| Funding                  | 22      | Give the source of funding and the role of the funders for the present study and, if applicable, for the original study on which the present article is based                                                | 14                  |

\*Give information separately for cases and controls in case-control studies and, if applicable, for exposed and unexposed groups in cohort and cross-sectional studies.

**Note:** An Explanation and Elaboration article discusses each checklist item and gives methodological background and published examples of transparent reporting. The STROBE checklist is best used in conjunction with this article (freely available on the Web sites of PLoS Medicine at <http://www.plosmedicine.org/>, Annals of Internal Medicine at <http://www.annals.org/>, and Epidemiology at <http://www.epidem.com/>). Information on the STROBE Initiative is available at [www.strobe-statement.org](http://www.strobe-statement.org).
